# Supplementary material for: Pra Rancangan Pabrik Pembuatan Etanol Dari Molases Dengan kapasitas Produksi 2550 Ton/Hari
Source: Royal Society of Chemistry journal article supplement (doi:10.1039/c6dt00052e), 2010-07-03
Supplement: c6dt00052e1.pdf [file c6dt00052e1.pdf]

Supporting Information for:

# Probing the Reactivity of Pentaphenylborole with N-H, O-H, P-H, and S-H Bonds

*Sam Yruegas,<sup>a</sup> Kexuan Huang,<sup>a</sup> David J. D. Wilson,<sup>b</sup> Jason L. Dutton<sup>b</sup> and Caleb D. Martin<sup>a\*</sup>*

<sup>a</sup>Baylor University, Department of Chemistry and Biochemistry, One Bear Place #97348, Waco, Texas 76798, United States

<sup>b</sup>Department of Chemistry and Physics, La Trobe Institute for Molecular Science, La Trobe University, Melbourne, Victoria, Australia

caleb\_d\_martin@baylor.edu

## Table of Contents

|                                                                                                                               |     |
|-------------------------------------------------------------------------------------------------------------------------------|-----|
| Stacked plot of crude $^1\text{H}$ NMR spectra of reaction of <b>A</b> with $\text{H}_2\text{O}$ and isolated <b>12</b> ..... | S3  |
| FT-IR spectrum of crude reaction of <b>A</b> with $\text{H}_2\text{O}$ .....                                                  | S4  |
| Multinuclear NMR spectra for <b>12</b> .....                                                                                  | S5  |
| FT-IR spectrum of <b>12</b> .....                                                                                             | S10 |
| Multinuclear NMR spectra for <b>13</b> .....                                                                                  | S11 |
| FT-IR spectrum of <b>13</b> .....                                                                                             | S17 |
| Multinuclear NMR spectra for <b>14</b> .....                                                                                  | S18 |
| Stacked plot of crude $^{11}\text{B}\{^1\text{H}\}$ NMR spectra of reaction of <b>A</b> with aniline.....                     | S23 |
| FT-IR spectrum of <b>14</b> .....                                                                                             | S24 |
| Multinuclear NMR spectra for <b>15</b> .....                                                                                  | S25 |
| FT-IR spectrum of <b>15</b> .....                                                                                             | S32 |
| X-ray crystallographic details.....                                                                                           | S33 |
| X-ray crystallography references.....                                                                                         | S34 |
| Cartesian coordinates of optimized geometries.....                                                                            | S35 |

Figure S-1: Stacked plot of crude  $^1\text{H}$  NMR spectra of the reaction of **A** with  $\text{H}_2\text{O}$  (top) and isolated **12** (bottom) in  $\text{CDCl}_3$  ( $\dagger$   $\text{CH}_2\text{Cl}_2$ , \* hexanes,  $\bullet$   $\text{CDCl}_3$ ).

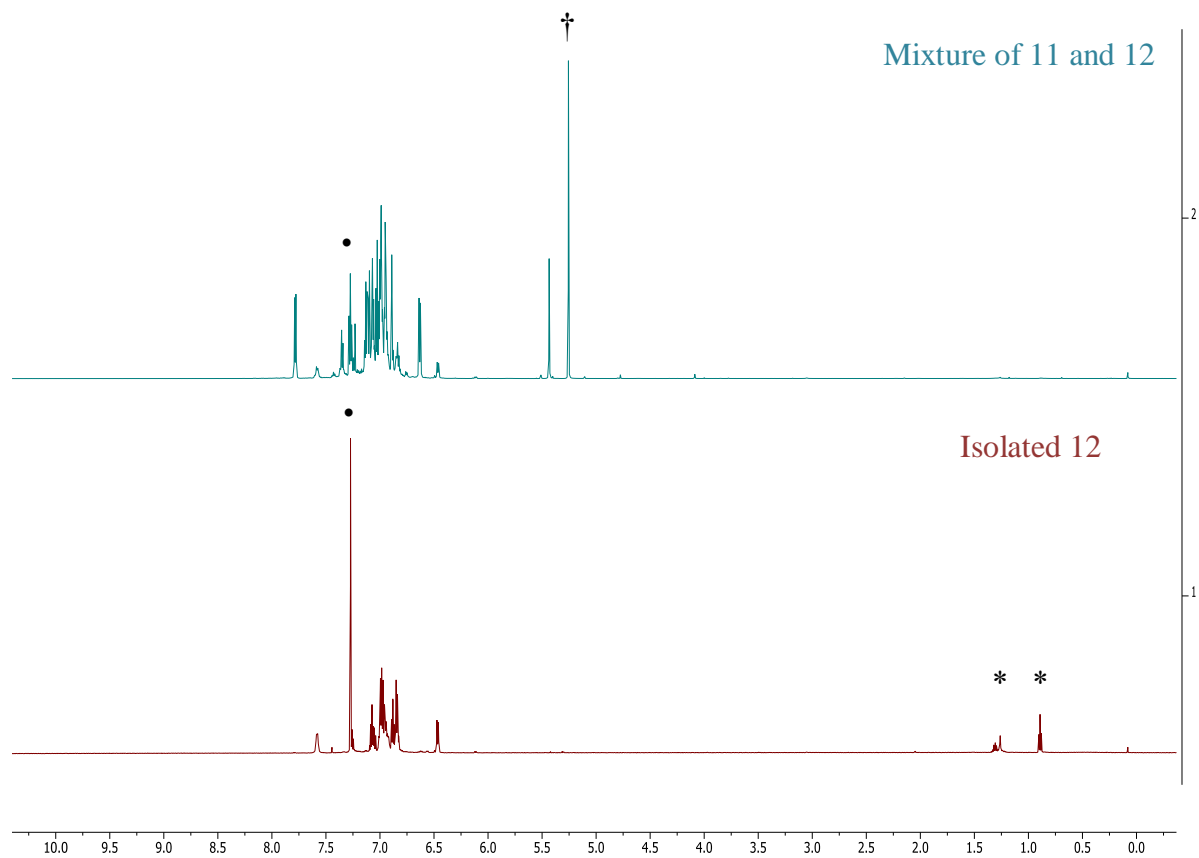

Figure S-2: FT-IR spectrum of crude reaction of **A** with H<sub>2</sub>O.

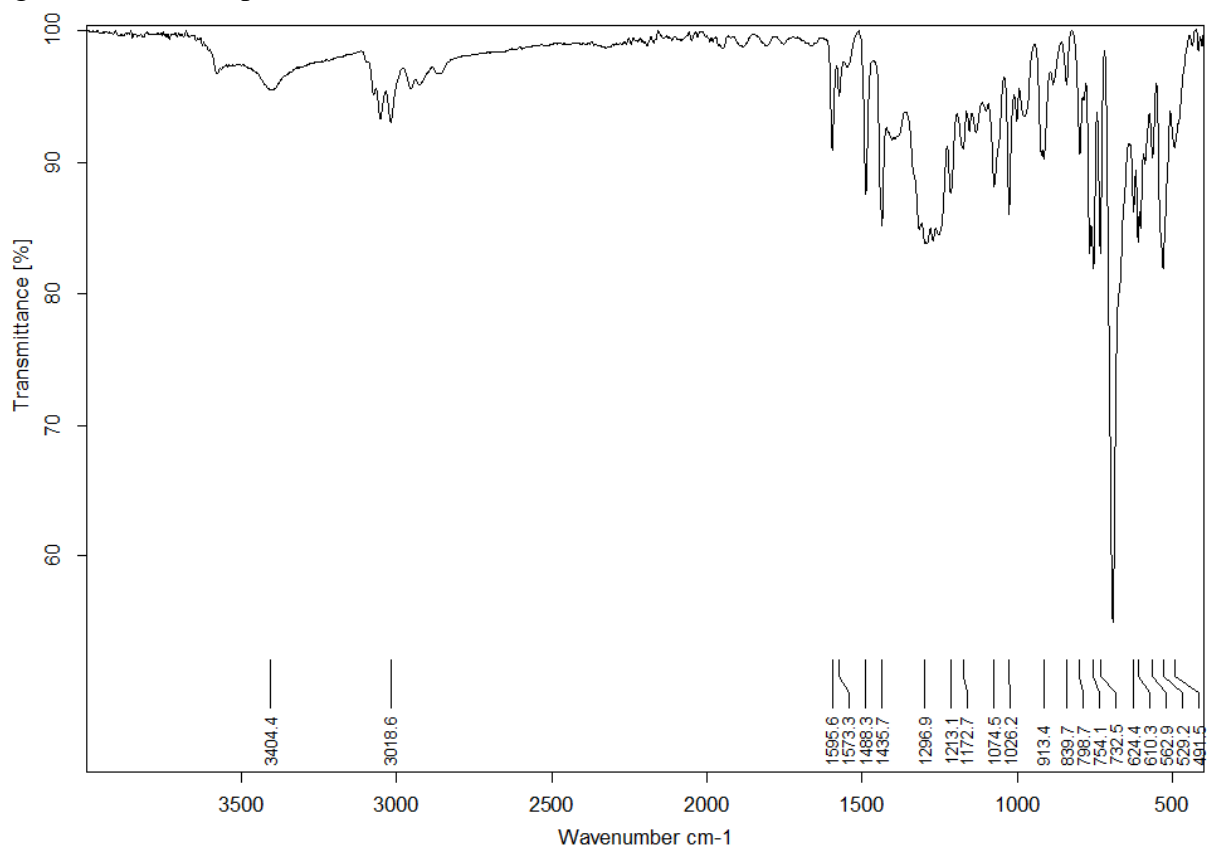

Figure S-3:  $^1\text{H}$  NMR spectrum of **12** in  $\text{CDCl}_3$  (\*hexanes).

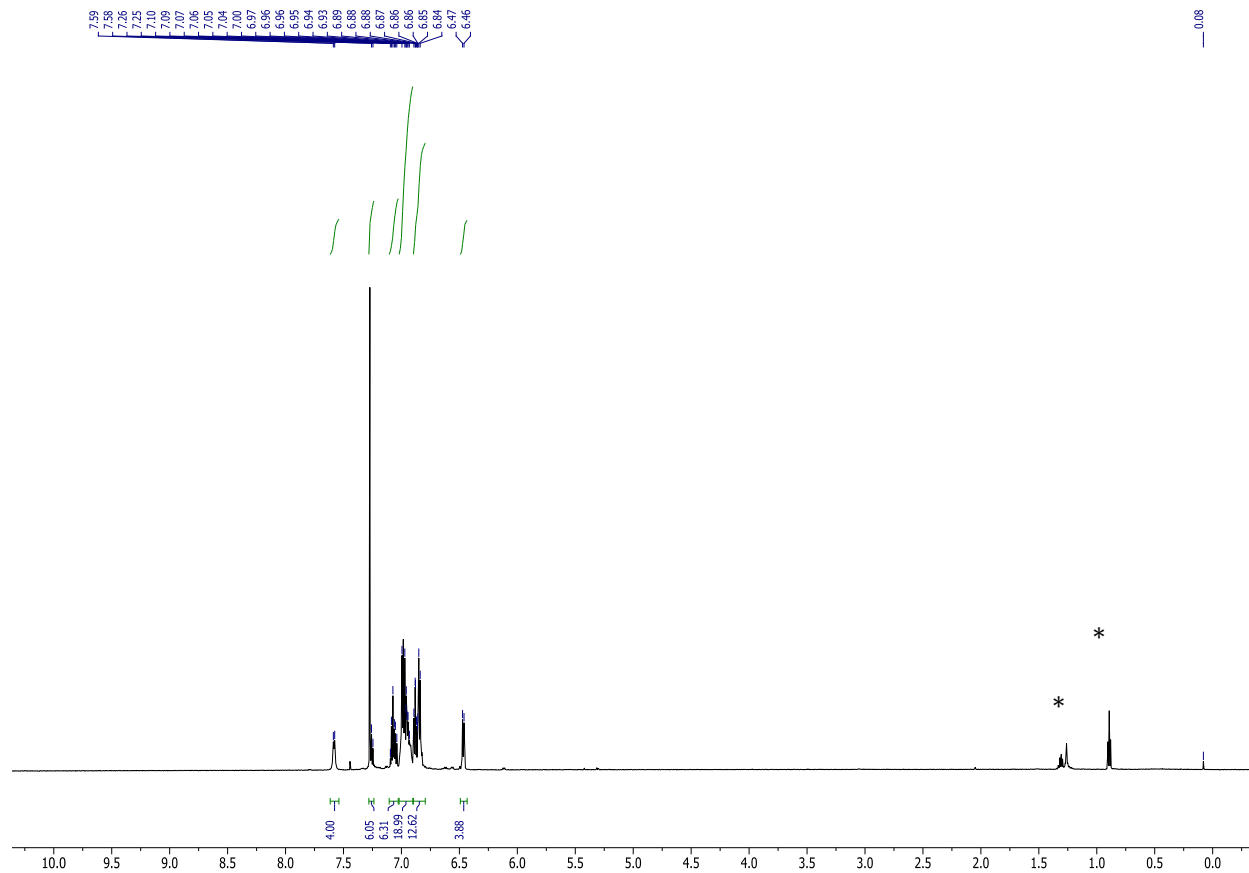

Figure S-4: Expansion of aromatic region of  $^1\text{H}$  NMR spectrum of **12** in  $\text{CDCl}_3$ .

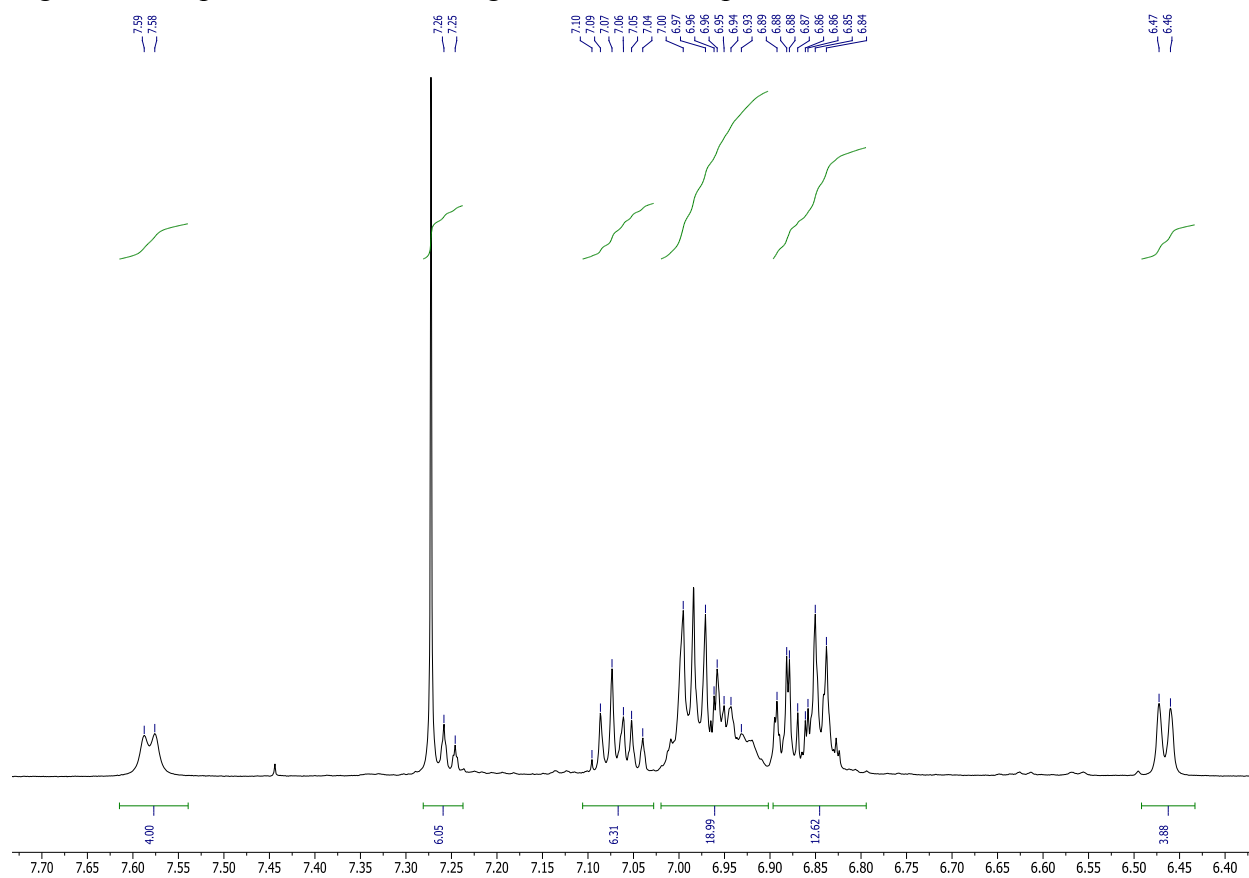

Figure S-5:  $^{11}\text{B}\{^1\text{H}\}$  NMR spectrum of **12** in  $\text{CDCl}_3$ .

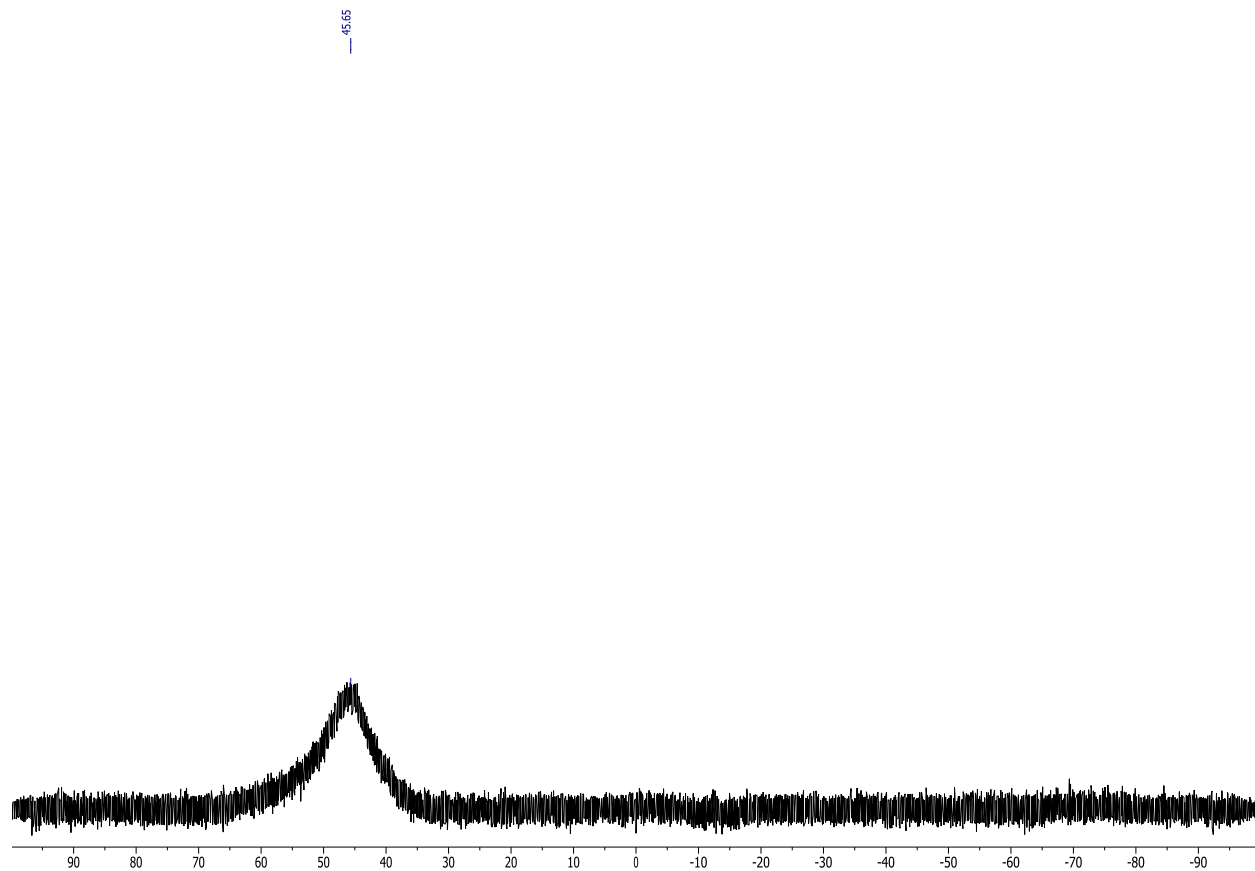

Figure S-6:  $^{13}\text{C}\{^1\text{H}\}$  NMR spectrum of **12** in  $\text{CDCl}_3$  (\*hexanes).

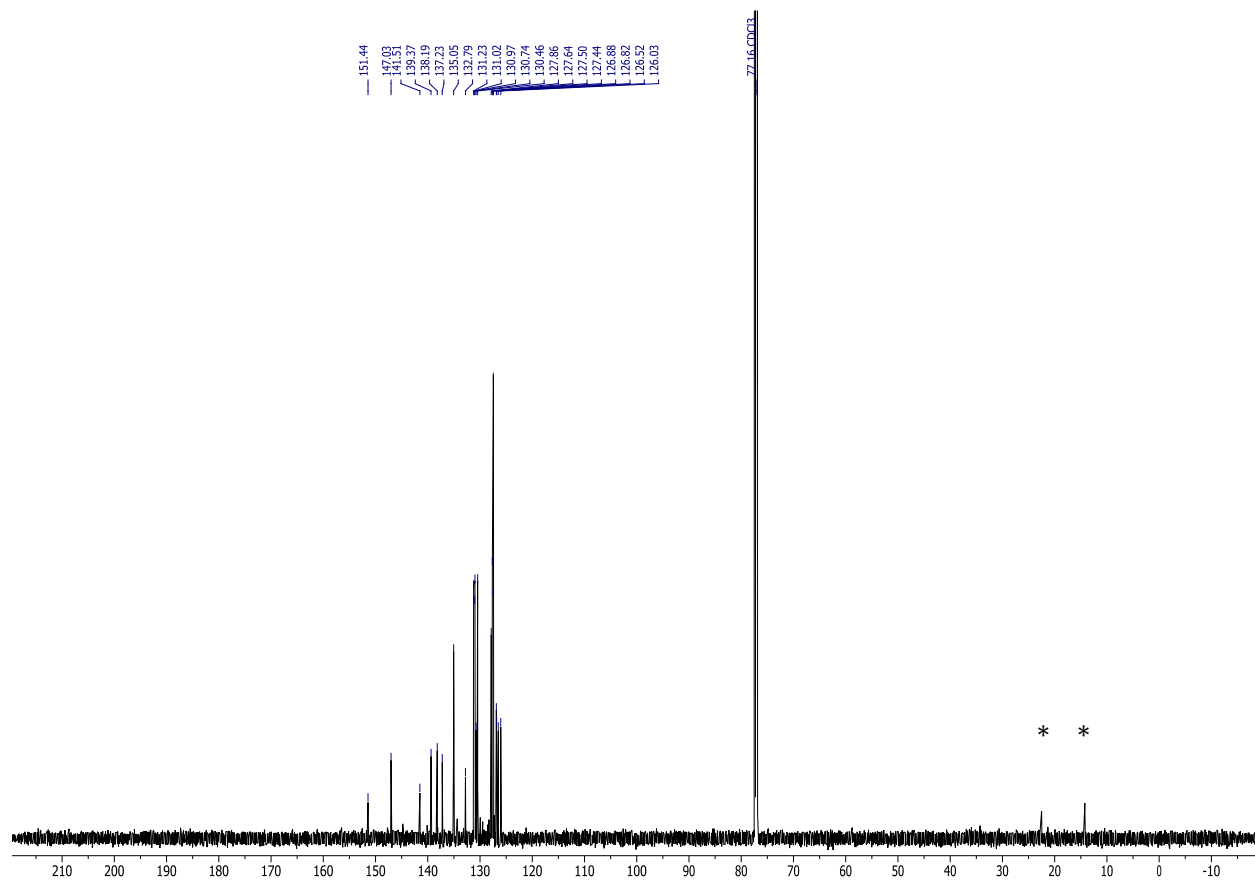



Figure S-7: Expansion of  $^{13}\text{C}\{^1\text{H}\}$  NMR spectrum of **12** in  $\text{CDCl}_3$ .

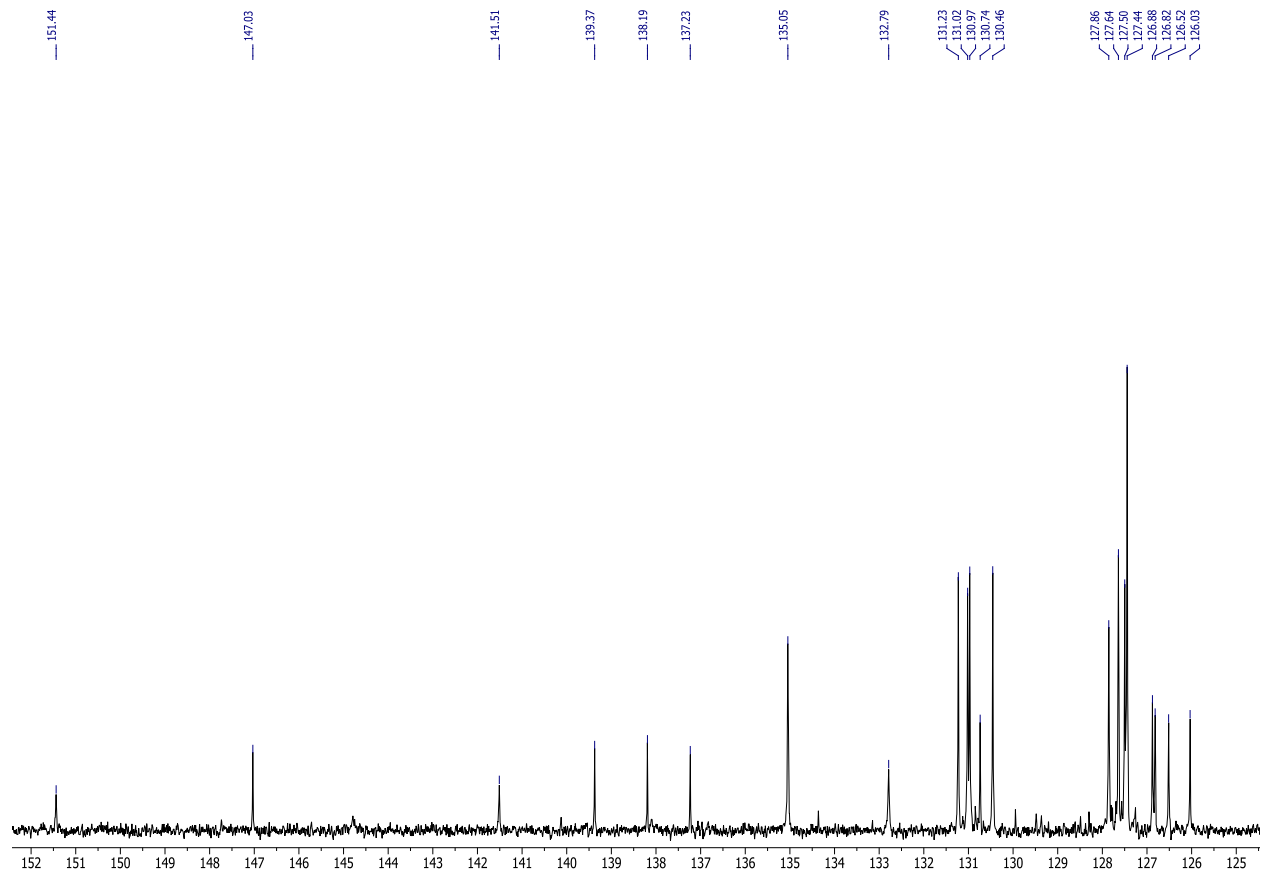

Figure S-8: FT-IR spectrum of **12**.

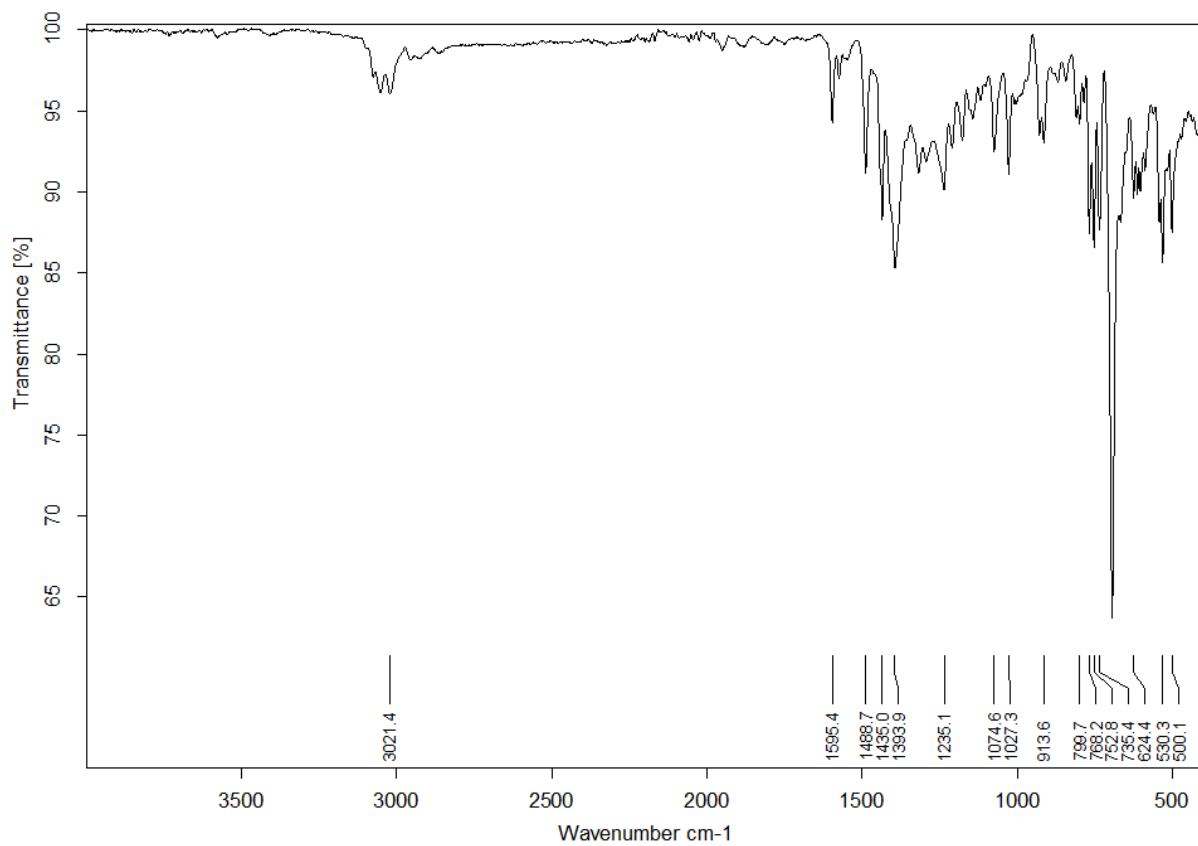

Figure S-9:  $^1\text{H}$  NMR of **13** at 25°C and -30°C in  $\text{CDCl}_3$ .

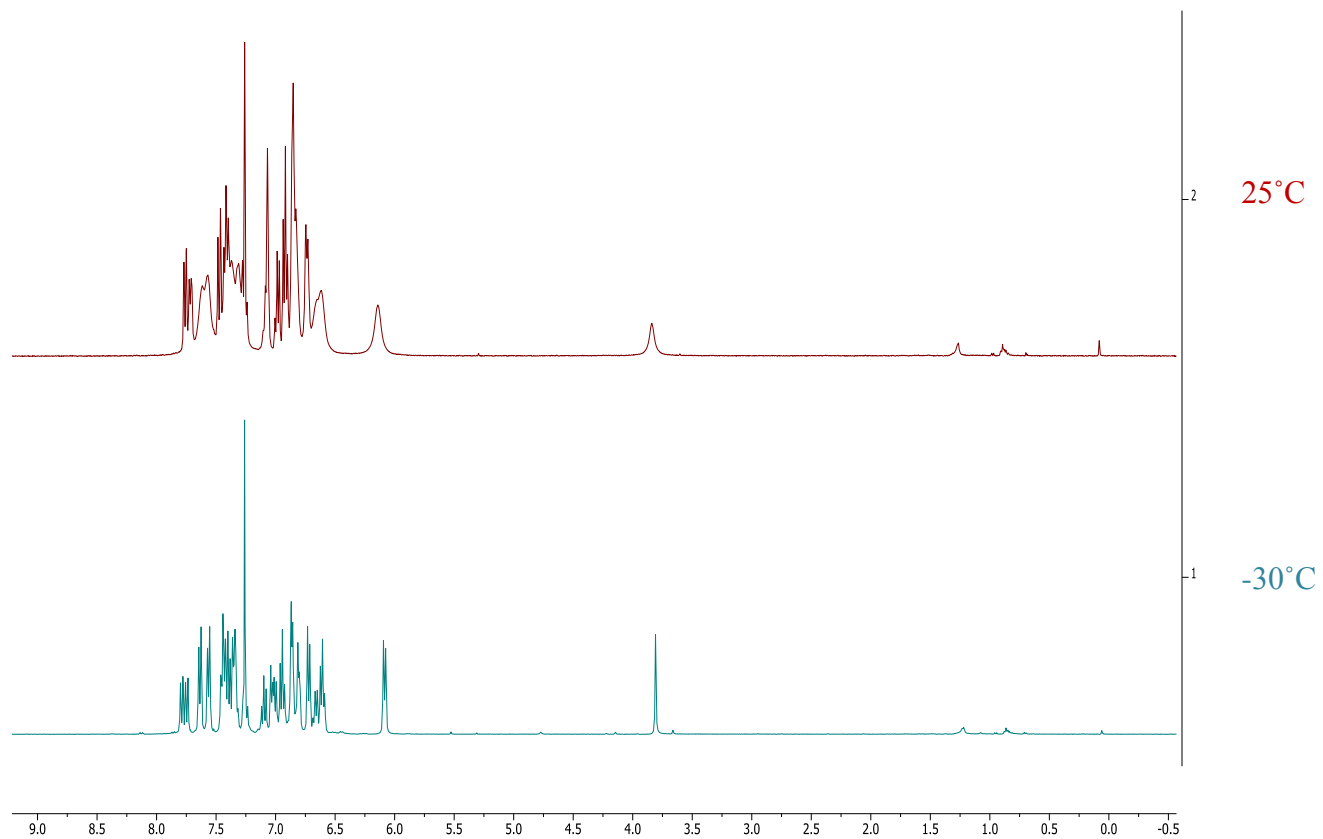

Figure S-10:  $^1\text{H}$  NMR spectrum of **13** in  $\text{CDCl}_3$  at  $-30^\circ\text{C}$  (\*hexanes).

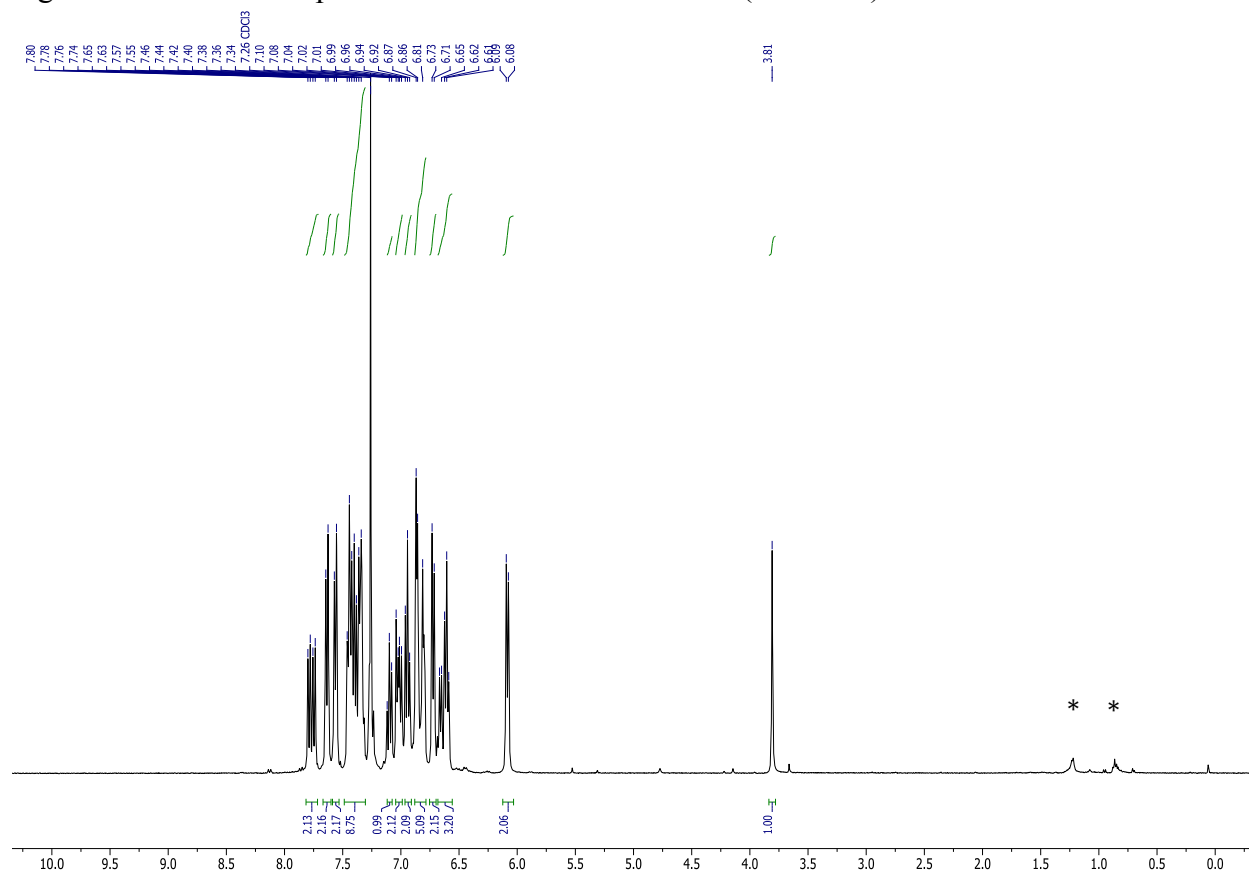

Figure S-11: Expansion of  $^1\text{H}$  NMR spectrum of **13** in  $\text{CDCl}_3$  at  $-30^\circ\text{C}$ .

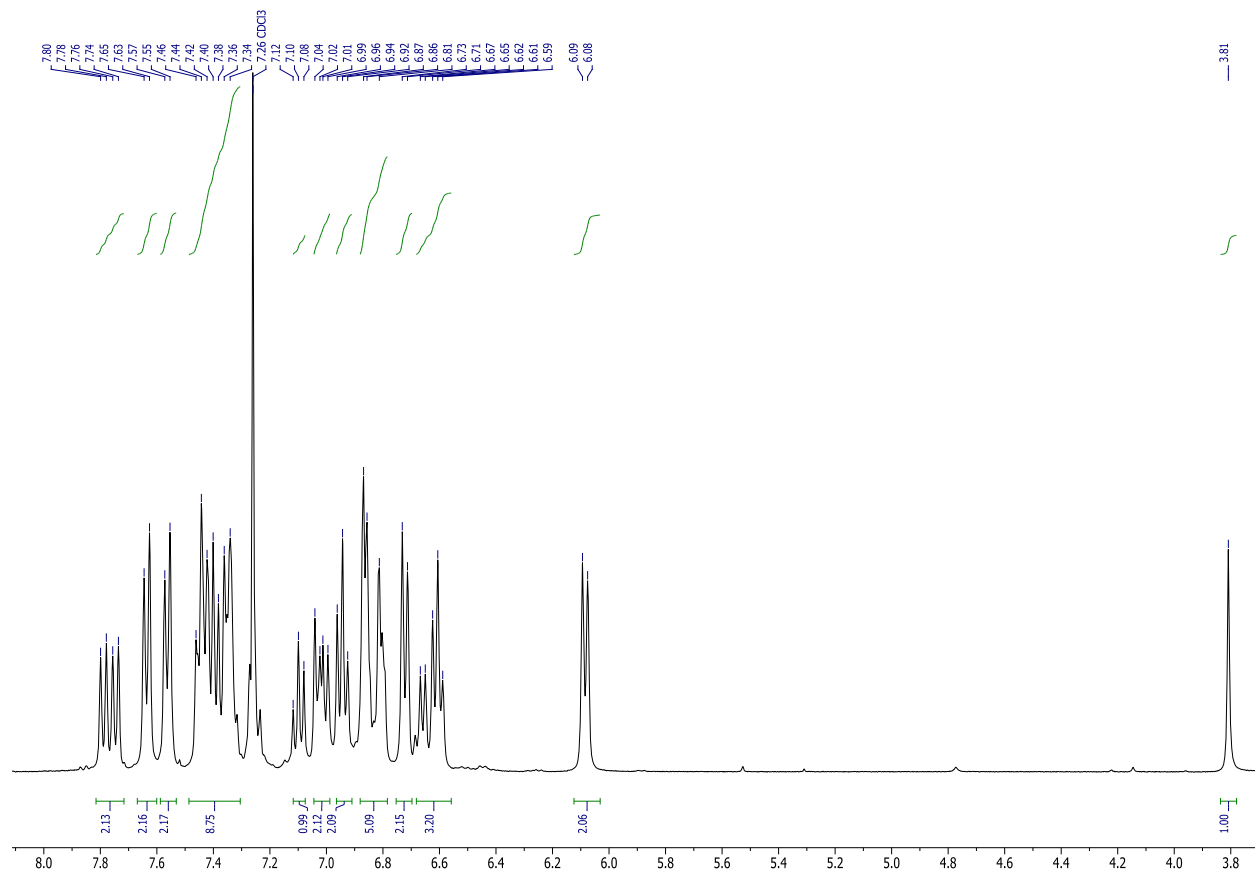

Figure S-12:  $^{11}\text{B}\{^1\text{H}\}$  NMR spectrum of **13** in  $\text{CDCl}_3$  at  $-30^\circ\text{C}$ .

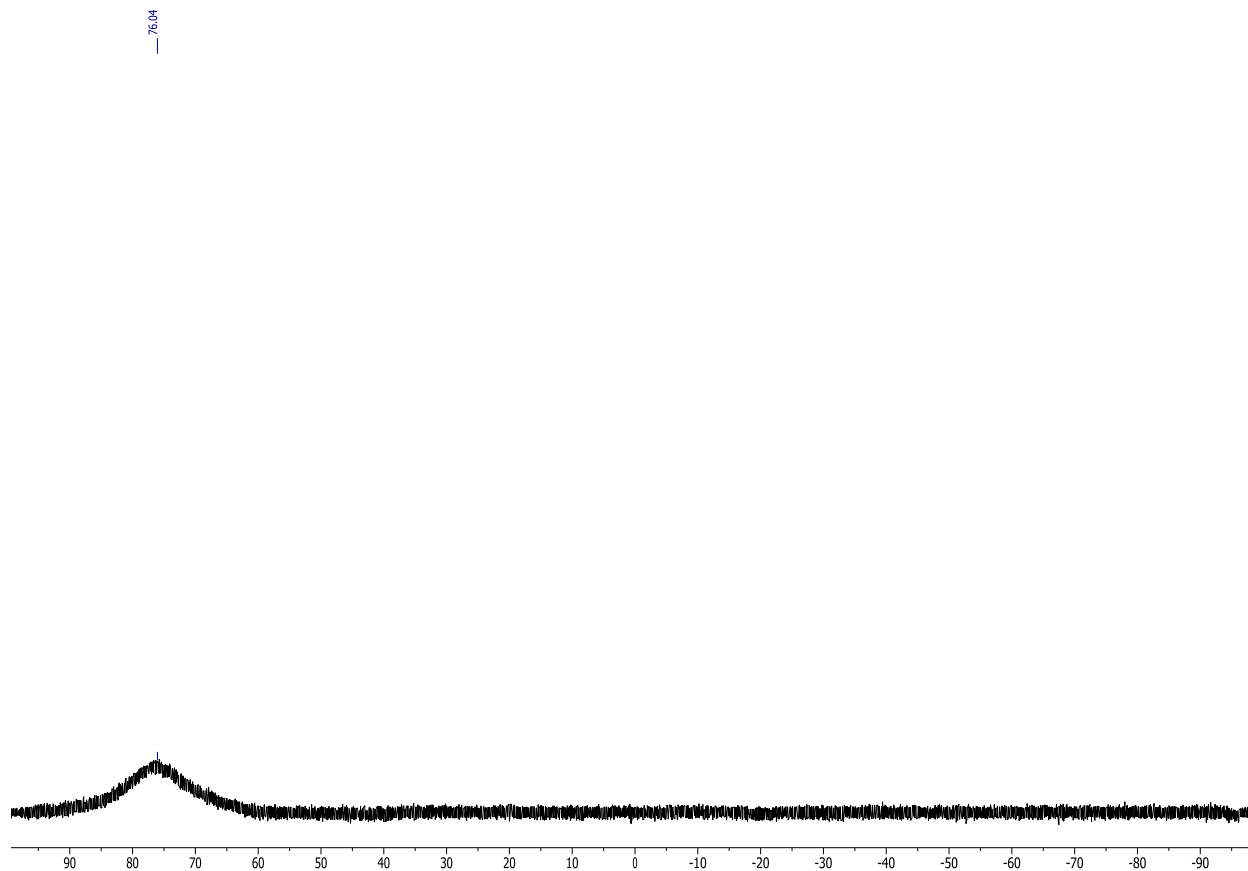

Figure S-13:  $^{13}\text{C}\{^1\text{H}\}$ NMR spectrum of **13** in  $\text{CDCl}_3$  at  $-30^\circ\text{C}$ .

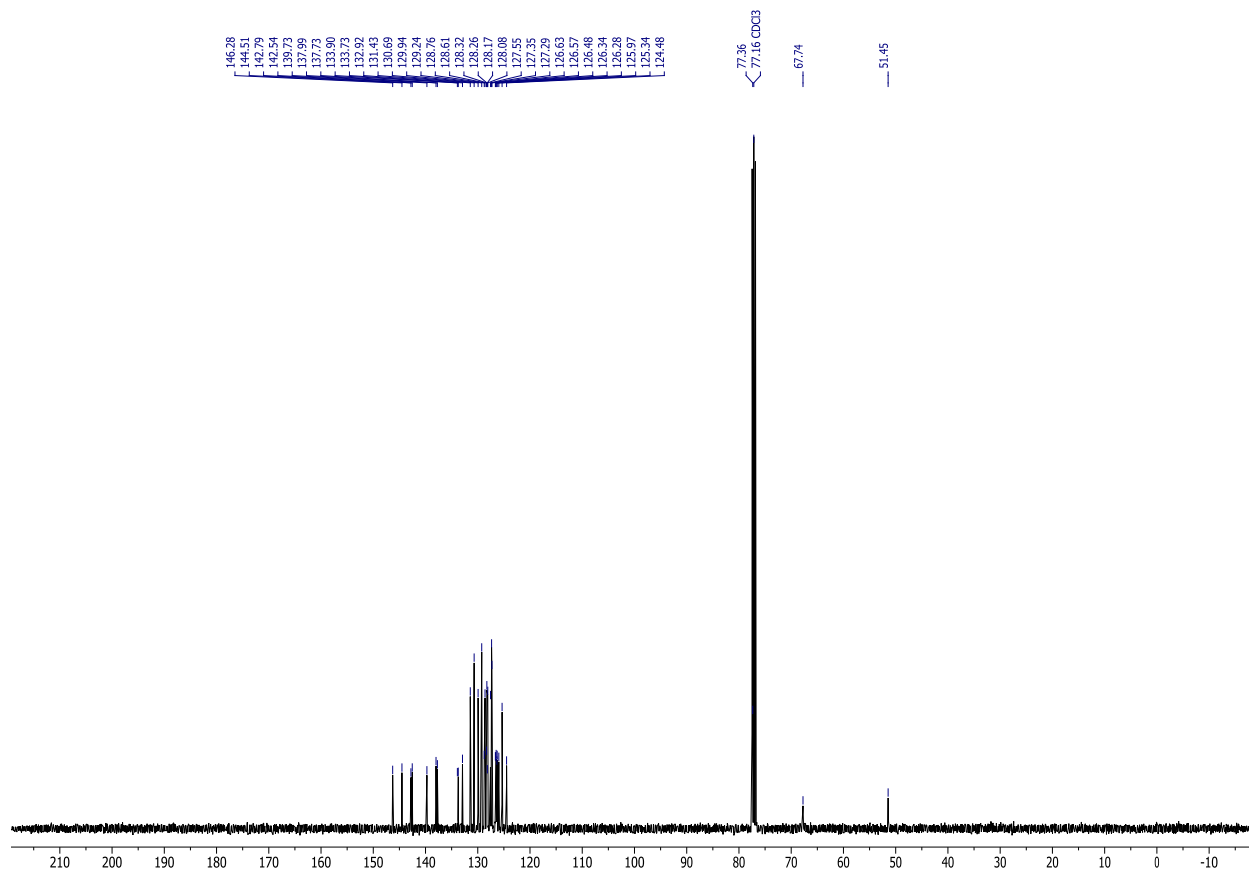

Figure S-14: Expansion of  $^{13}\text{C}\{^1\text{H}\}$  NMR spectrum of **13** in  $\text{CDCl}_3$  at  $-30^\circ\text{C}$ .

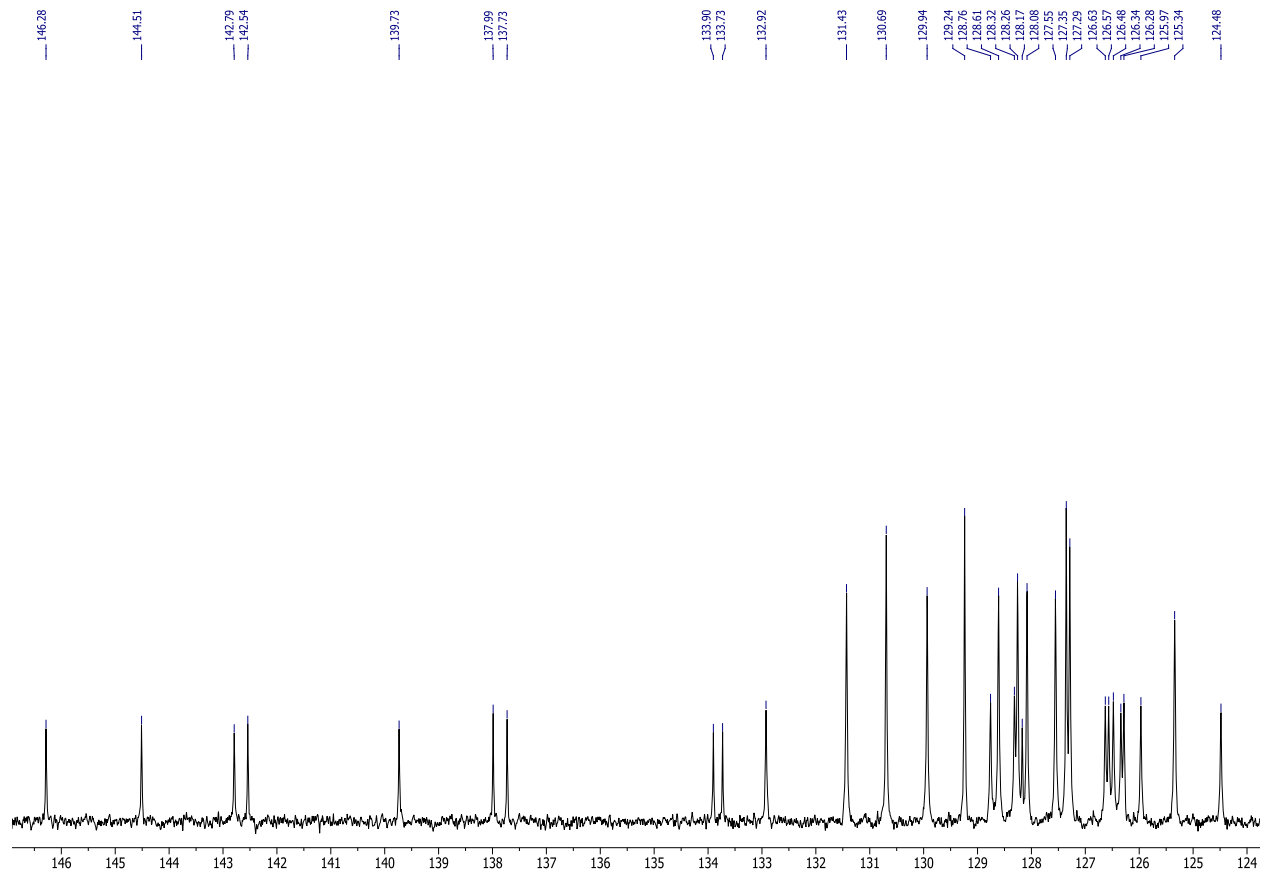



Figure S-15: FT-IR spectrum of **13**.

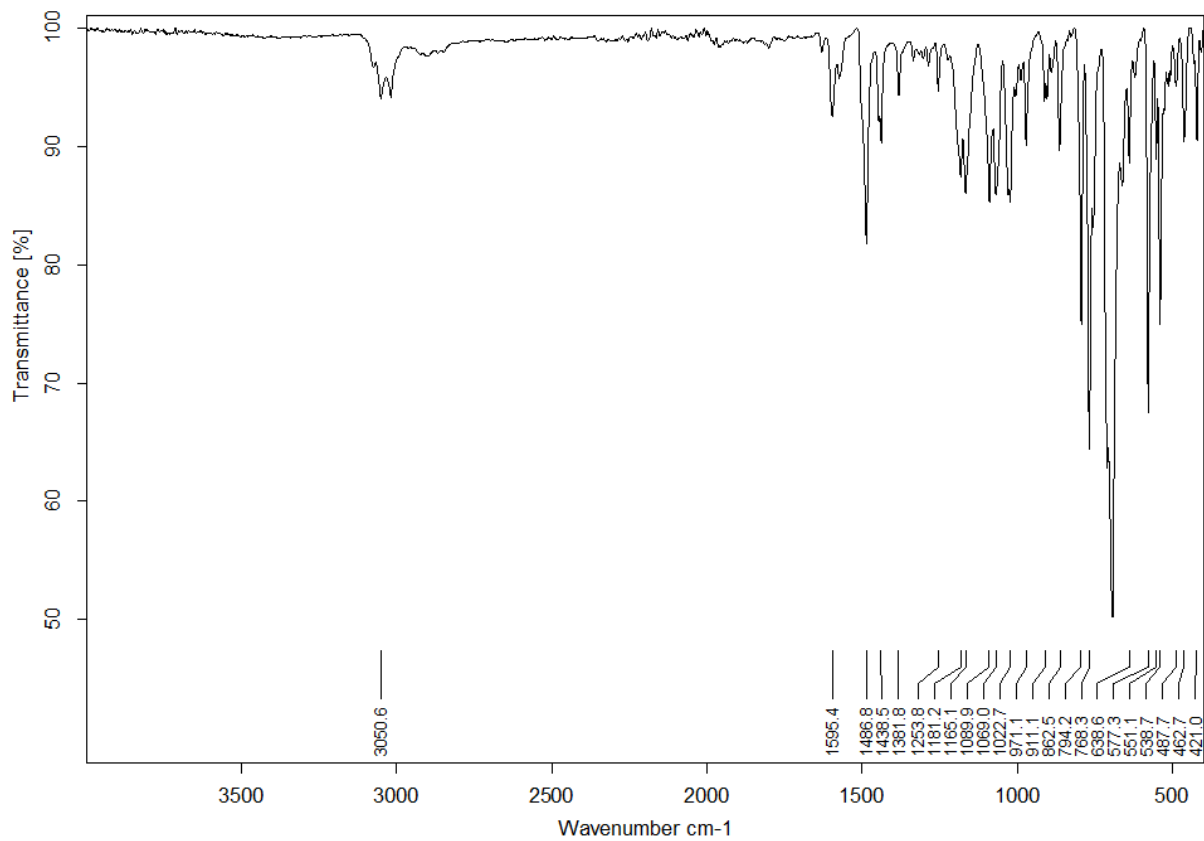

Figure S-16:  $^1\text{H}$  NMR spectrum of **14** in  $\text{CDCl}_3$  (\*hexanes).

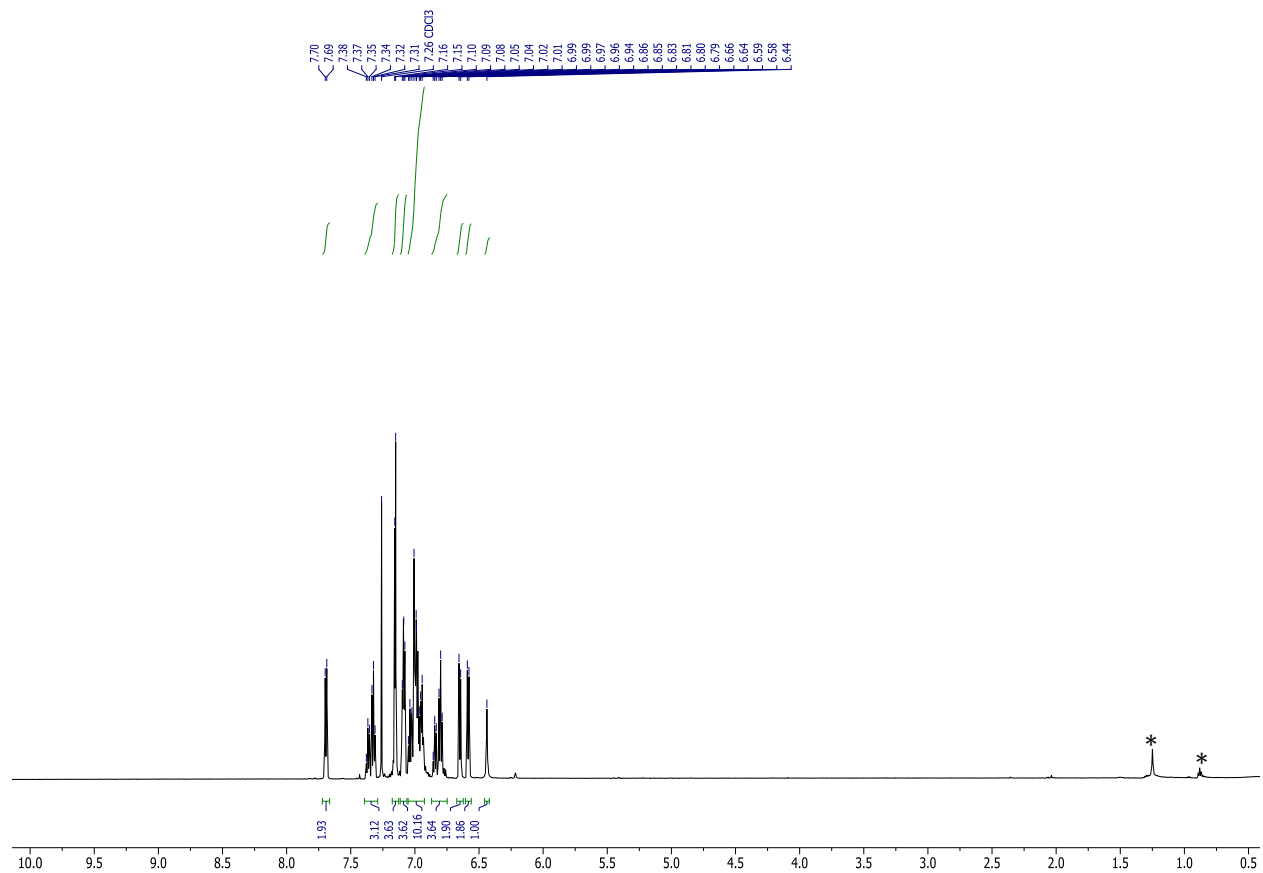

Figure S-17: Expansion of aromatic region of  $^1\text{H}$  NMR spectrum of **14** in  $\text{CDCl}_3$ .

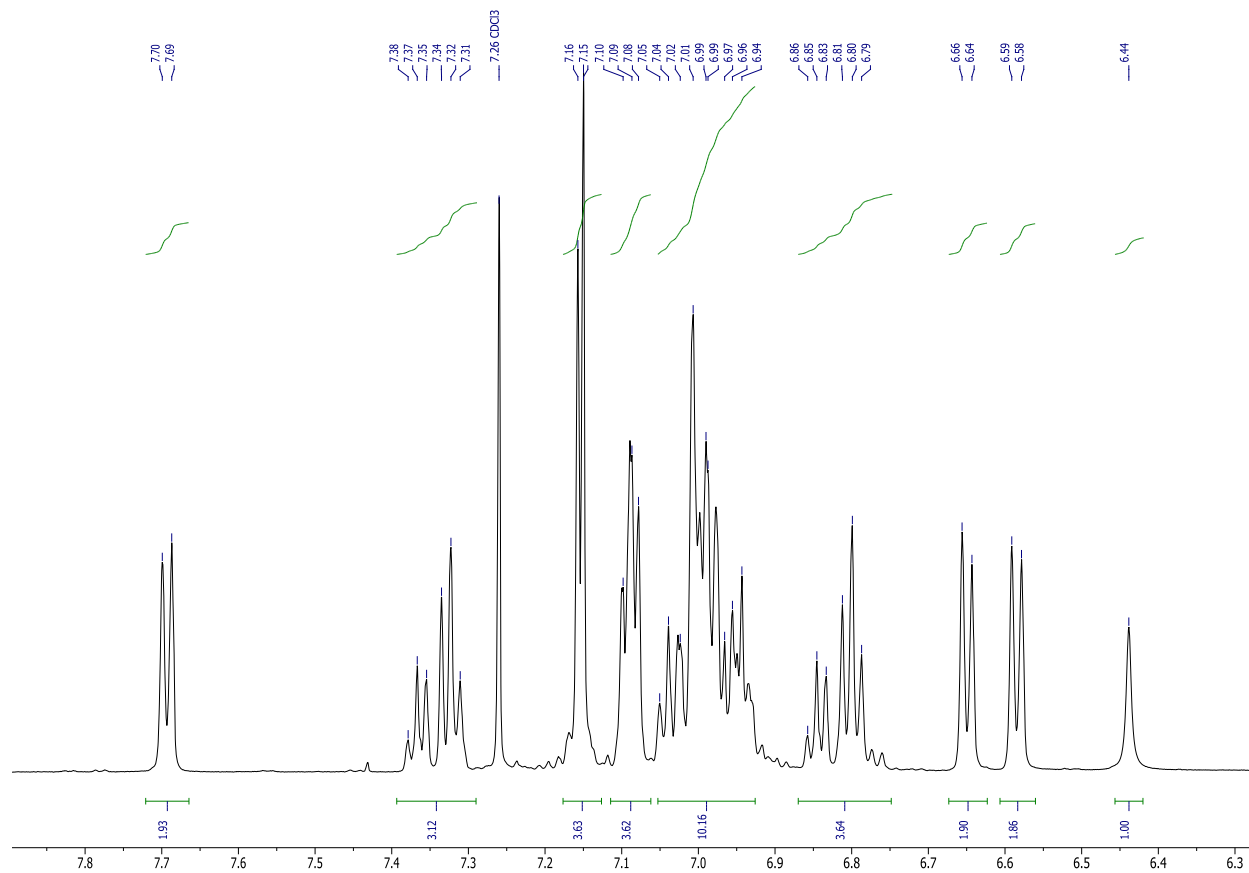

Figure S-18:  $^{11}\text{B}\{^1\text{H}\}$  NMR spectrum of **14** in  $\text{CDCl}_3$ .

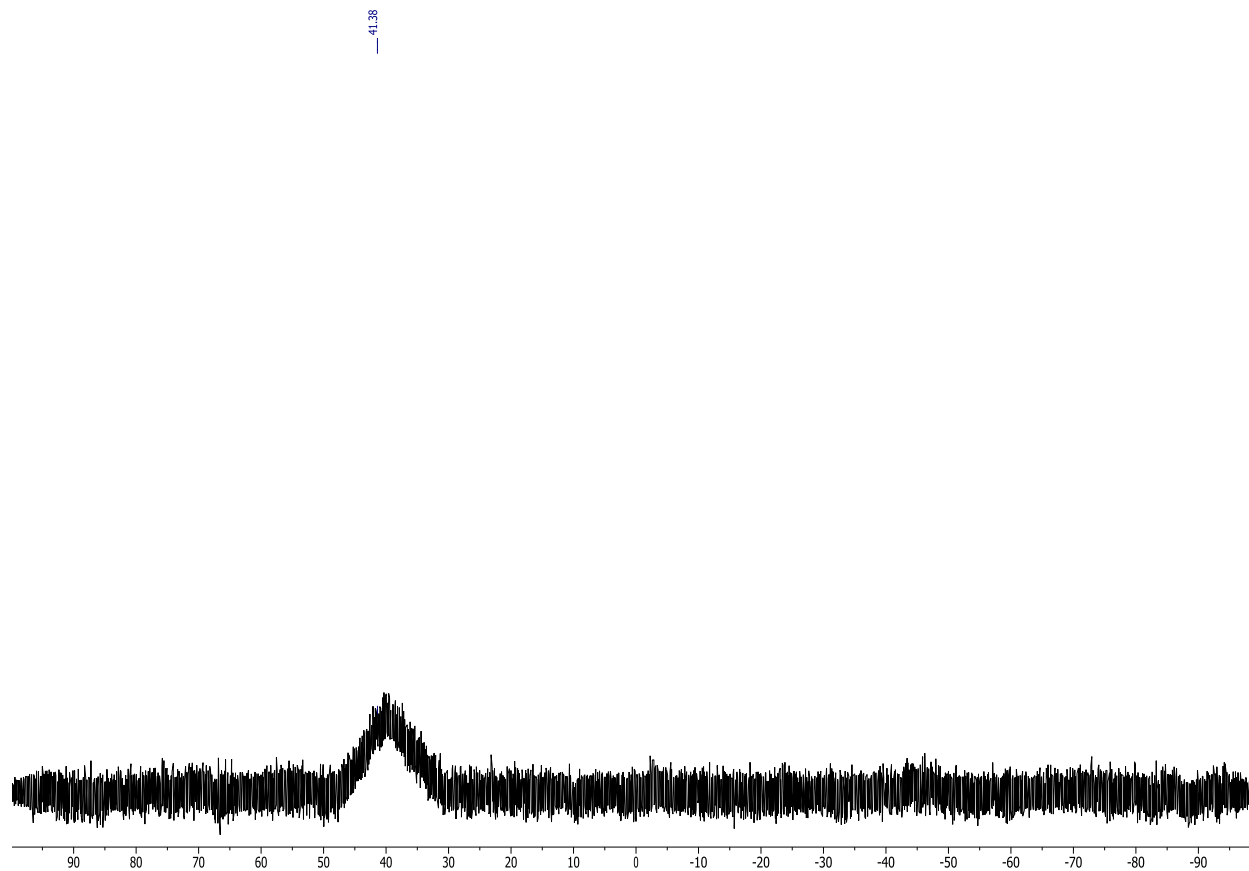

Figure S-19:  $^{13}\text{C}\{^1\text{H}\}$  NMR spectrum of **14** in  $\text{CDCl}_3$ .

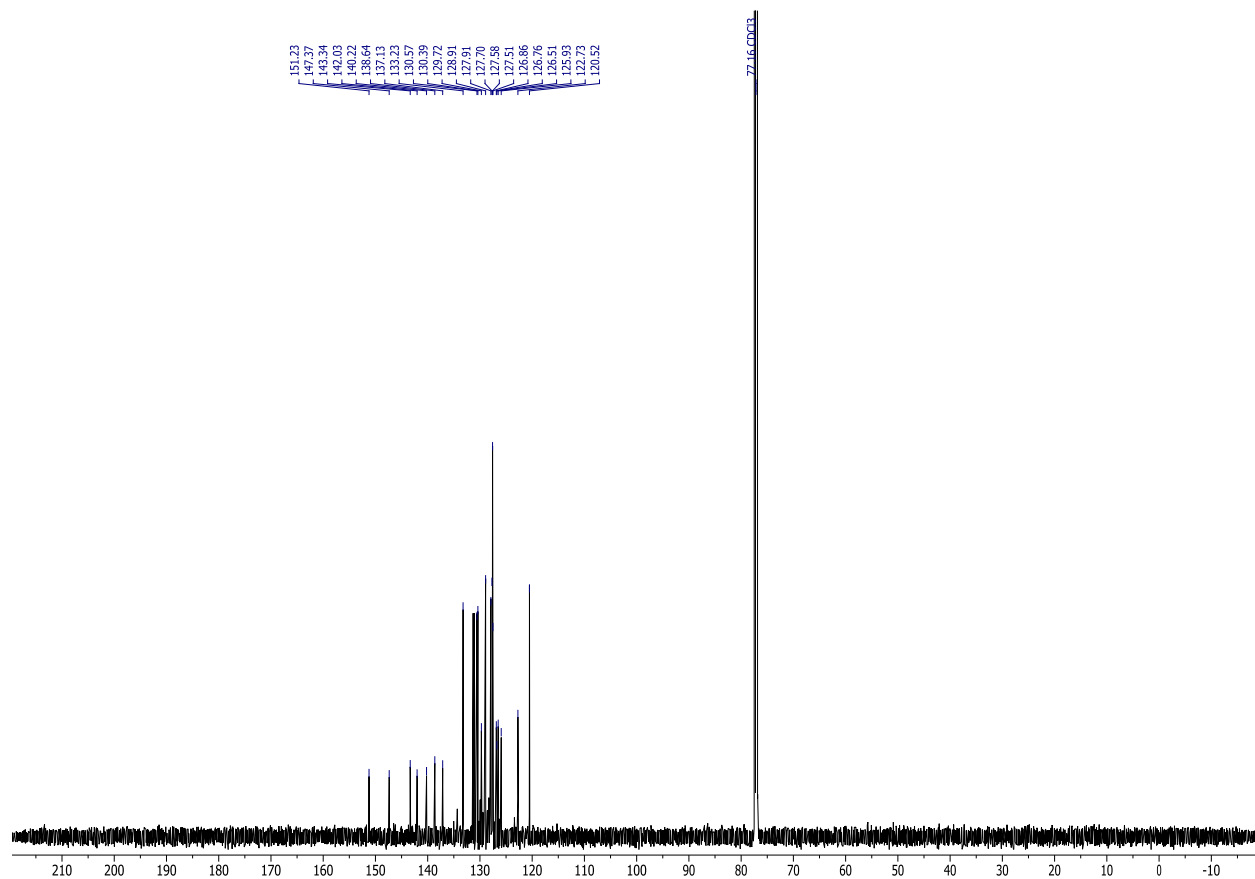

Figure S-20: Expansion of  $^{13}\text{C}\{^1\text{H}\}$  NMR spectrum of **14** in  $\text{CDCl}_3$ .

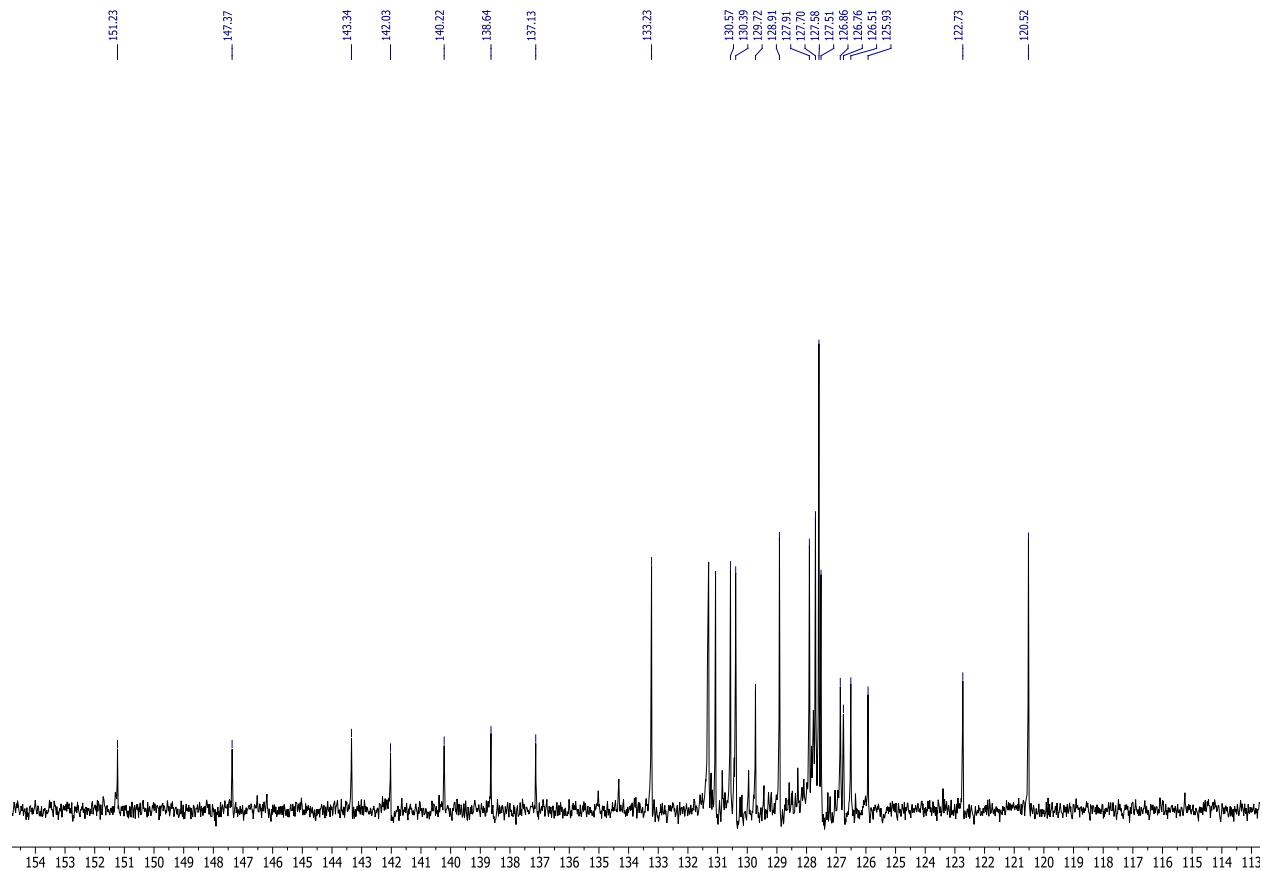

Figure S-21: Stacked plot of crude  $^{11}\text{B}\{^1\text{H}\}$  NMR spectra of the reaction of **A** with aniline at  $-40^\circ\text{C}$  in  $\text{CDCl}_3$  over a period of ten minutes.

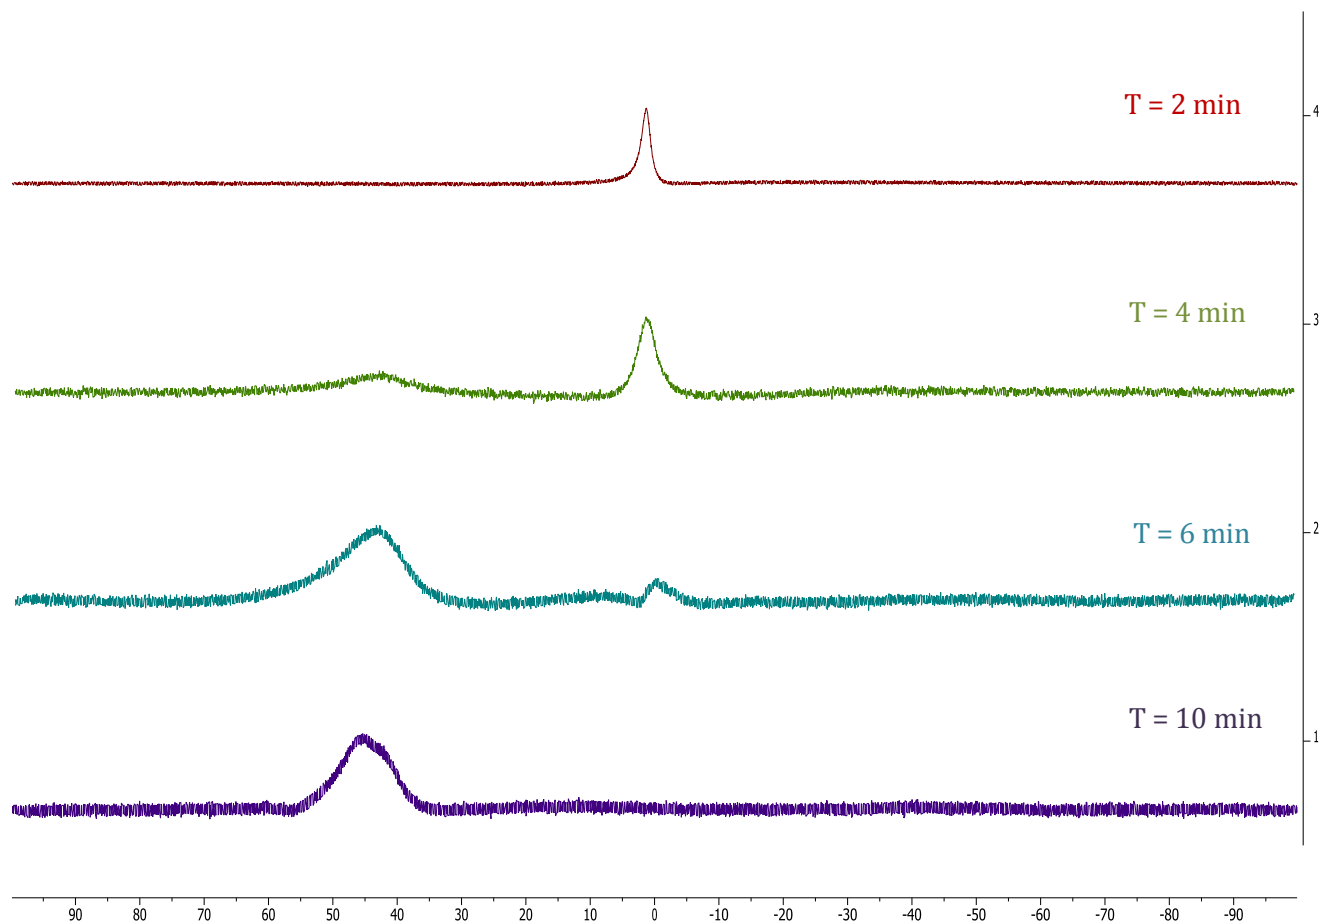

Figure S-22: FT-IR spectrum of **14**.

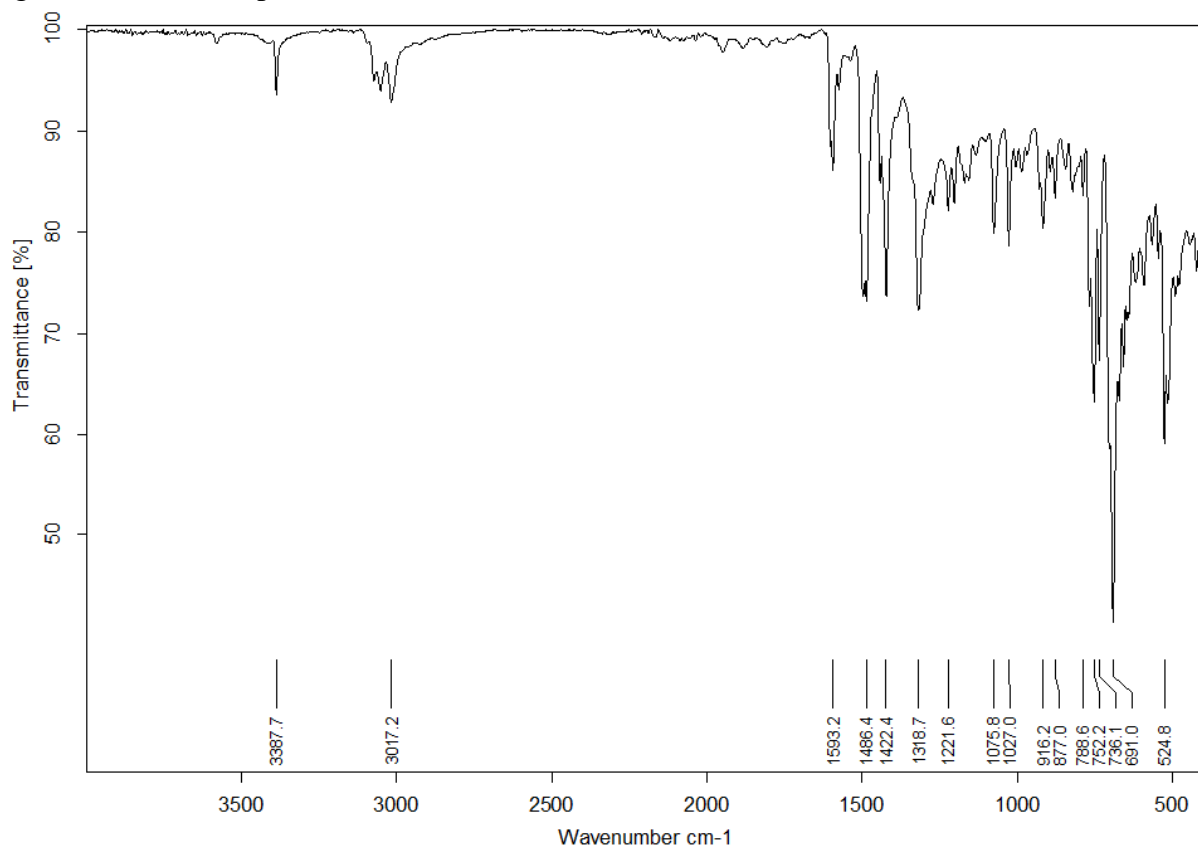



Figure S-23:  $^1\text{H}$  NMR spectrum of **15** in  $\text{CDCl}_3$  (†  $\text{CH}_2\text{Cl}_2$ , \* *n*-pentane, • silicone grease).

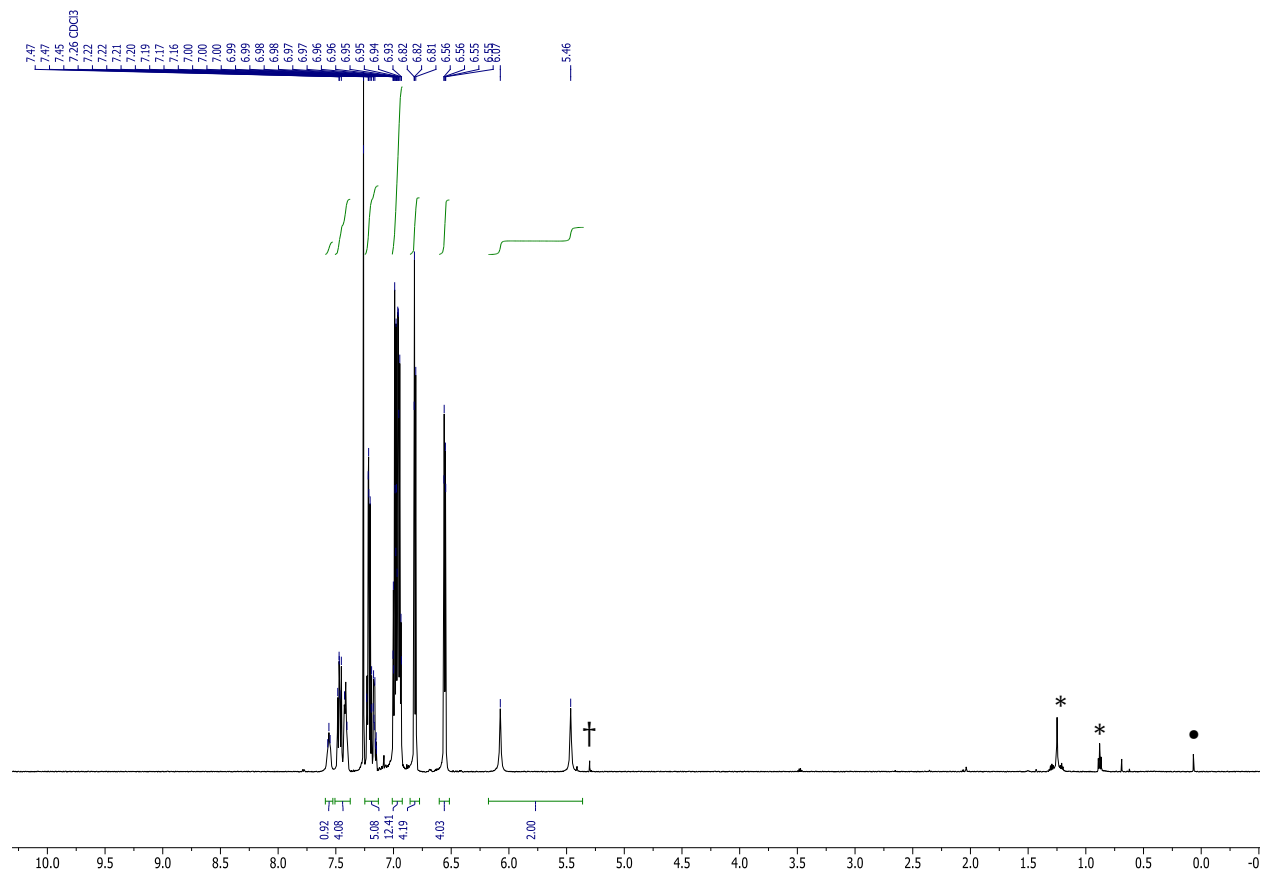

Figure S-24: Expansion of  $^1\text{H}$  NMR spectrum of **15** in  $\text{CDCl}_3$ .

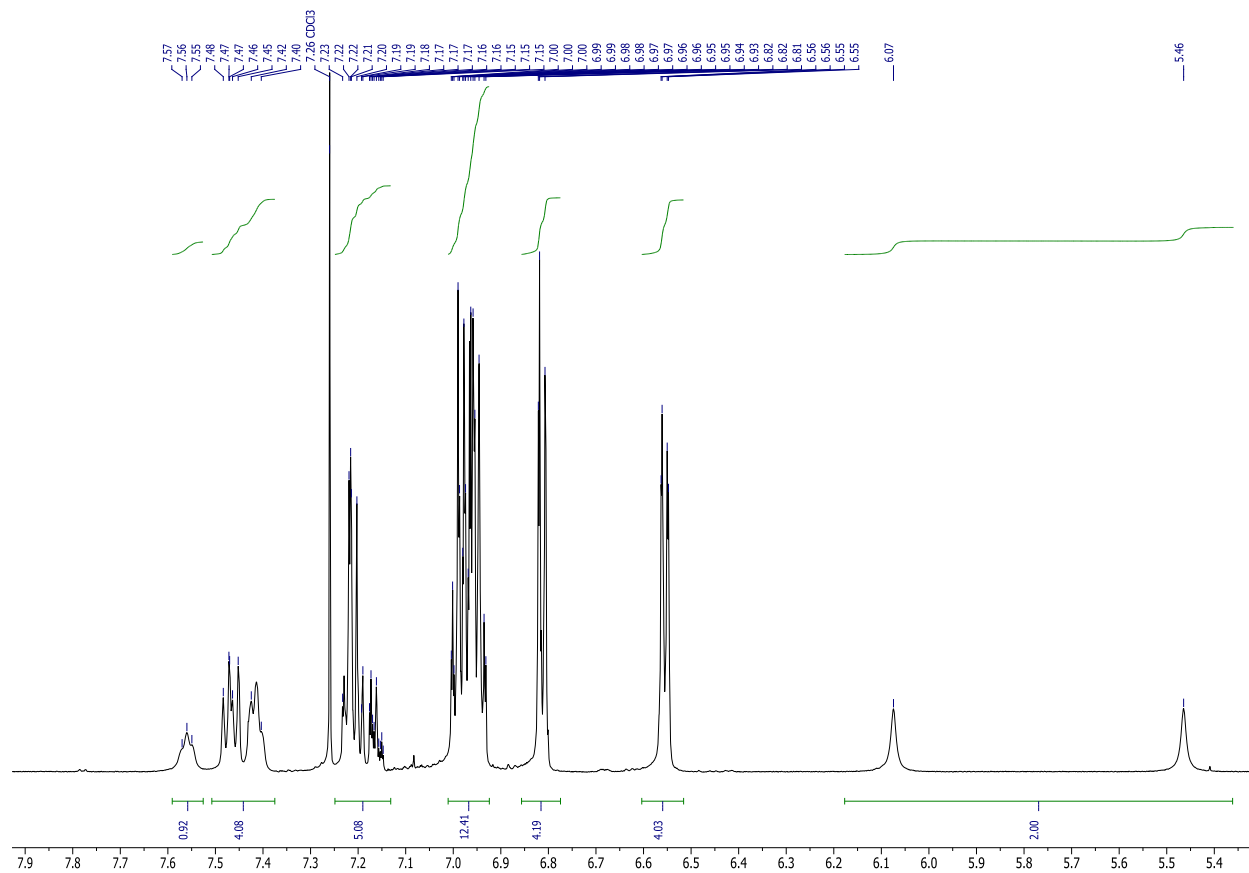

Figure S-25:  $^{11}\text{B}\{^1\text{H}\}$  NMR spectrum of **15** in  $\text{CDCl}_3$ .

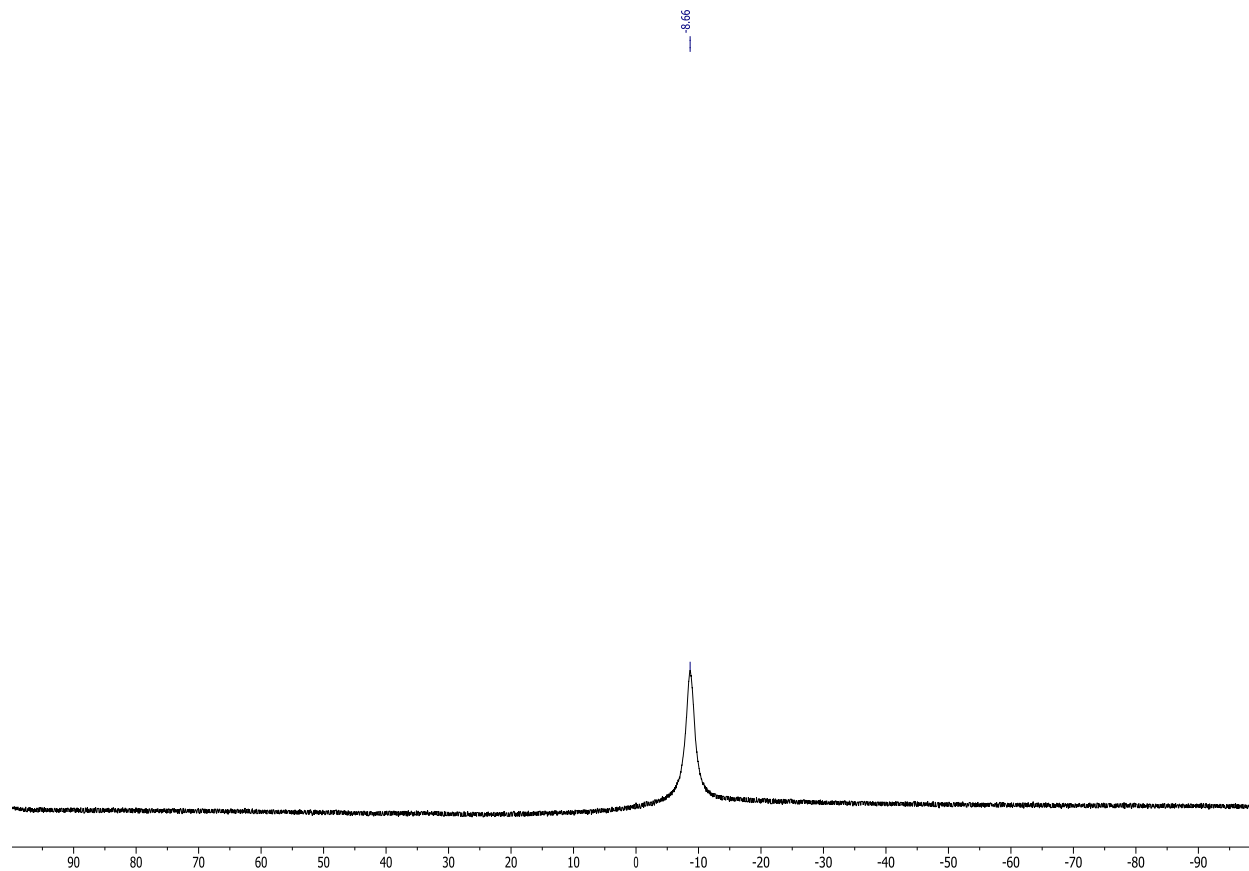

Figure S-26:  $^{31}\text{P}\{^1\text{H}\}$  NMR spectrum of **15** in  $\text{CDCl}_3$ .

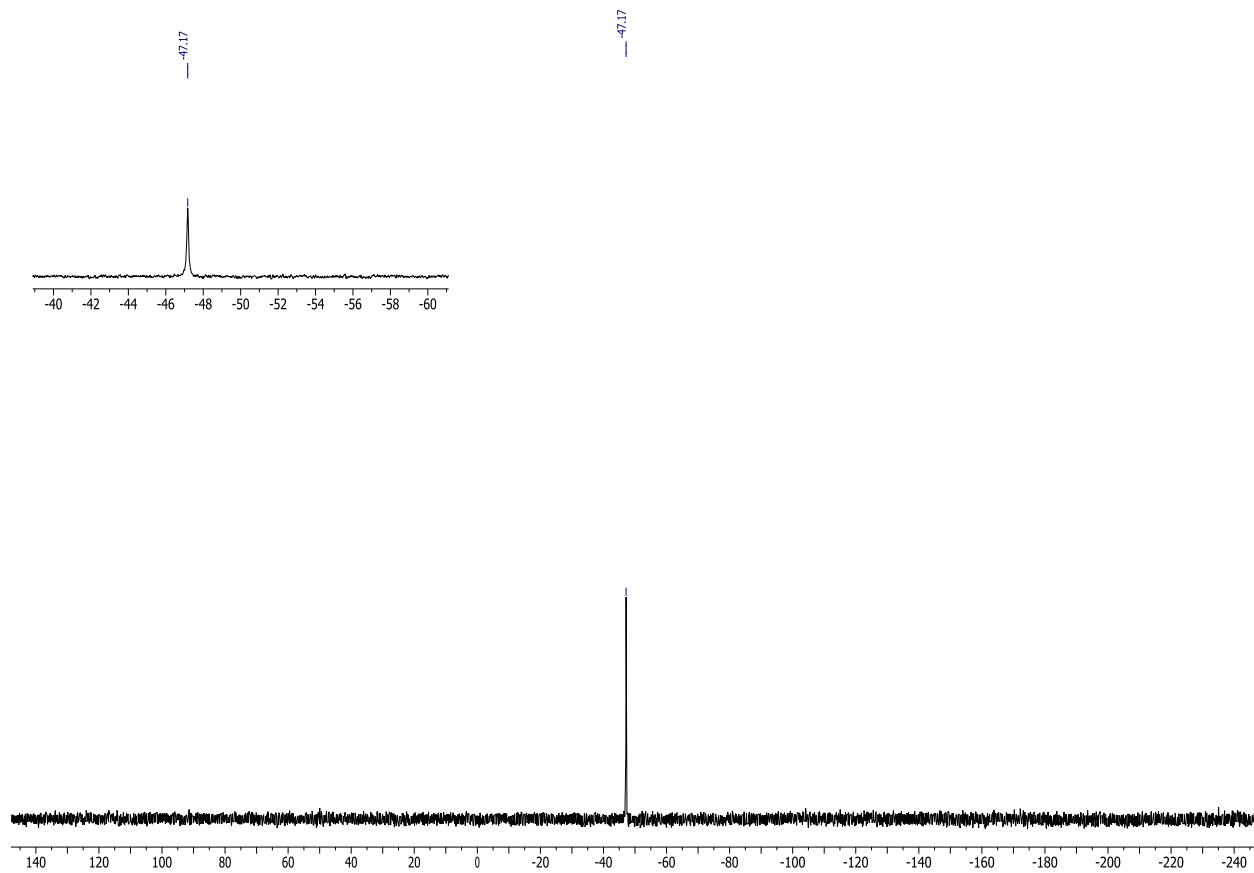

Figure S-27:  $^{31}\text{P}$  NMR spectrum of **15** in  $\text{CDCl}_3$ .

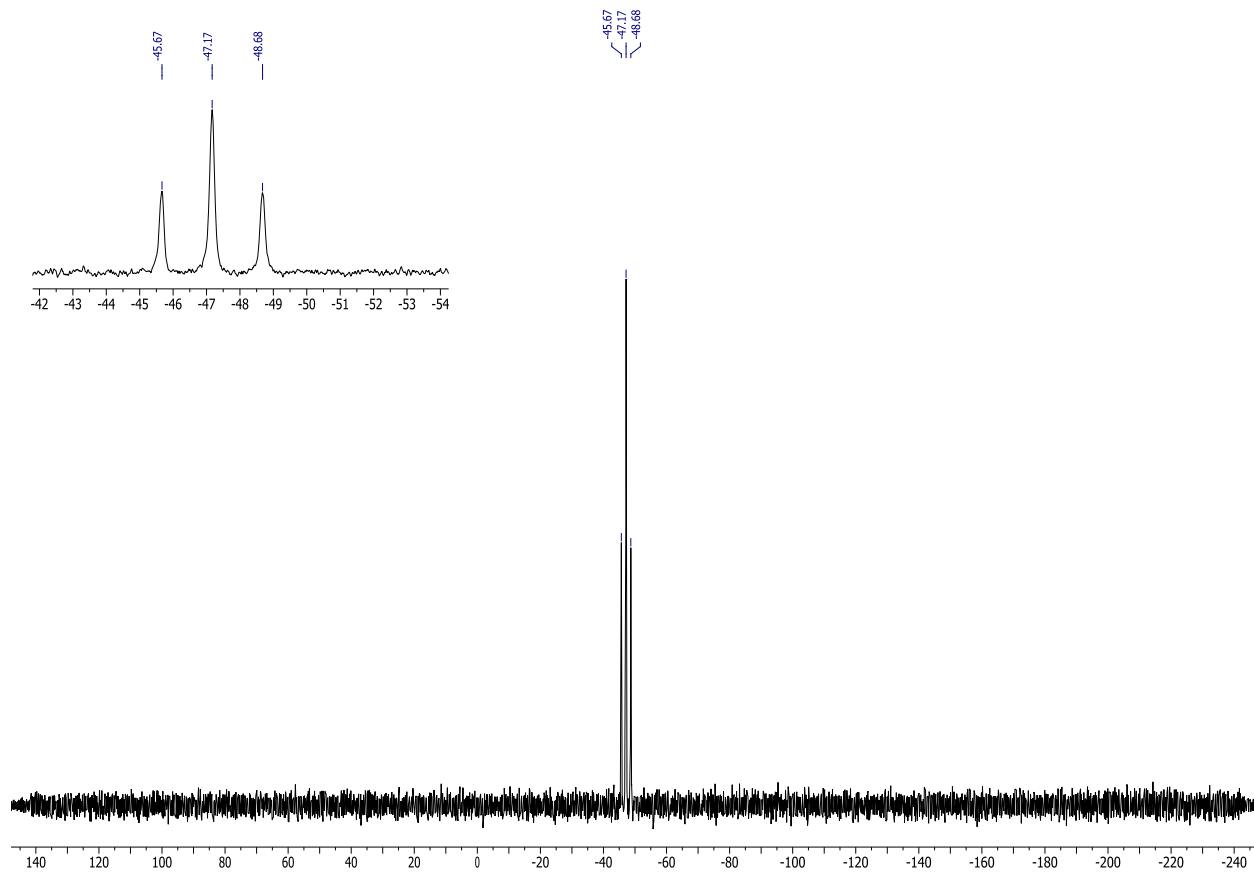

Figure S-28:  $^{13}\text{C}\{^1\text{H}\}$  NMR spectrum of **15** in  $\text{CDCl}_3$ .

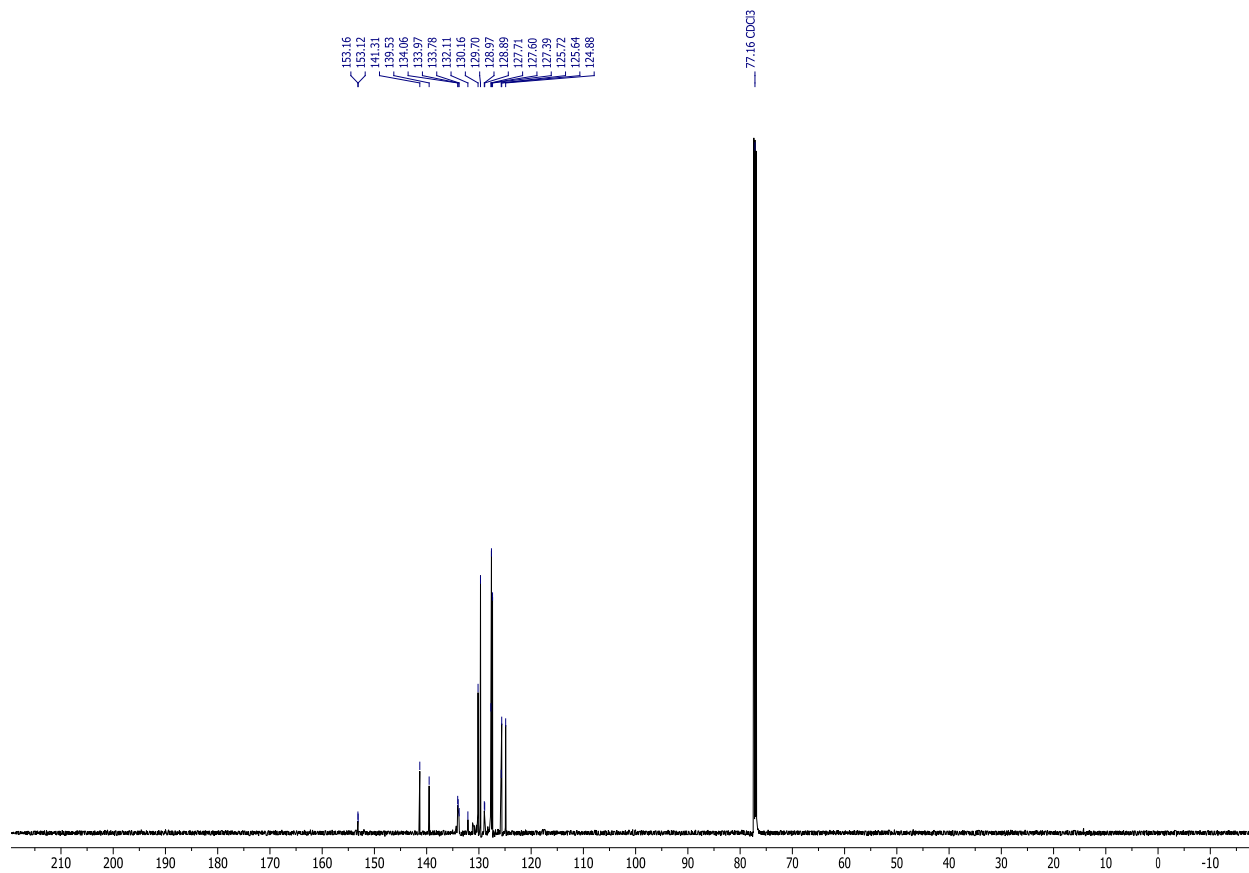

Figure S-29: Expansion of  $^{13}\text{C}\{^1\text{H}\}$  NMR spectrum of **15** in  $\text{CDCl}_3$ .

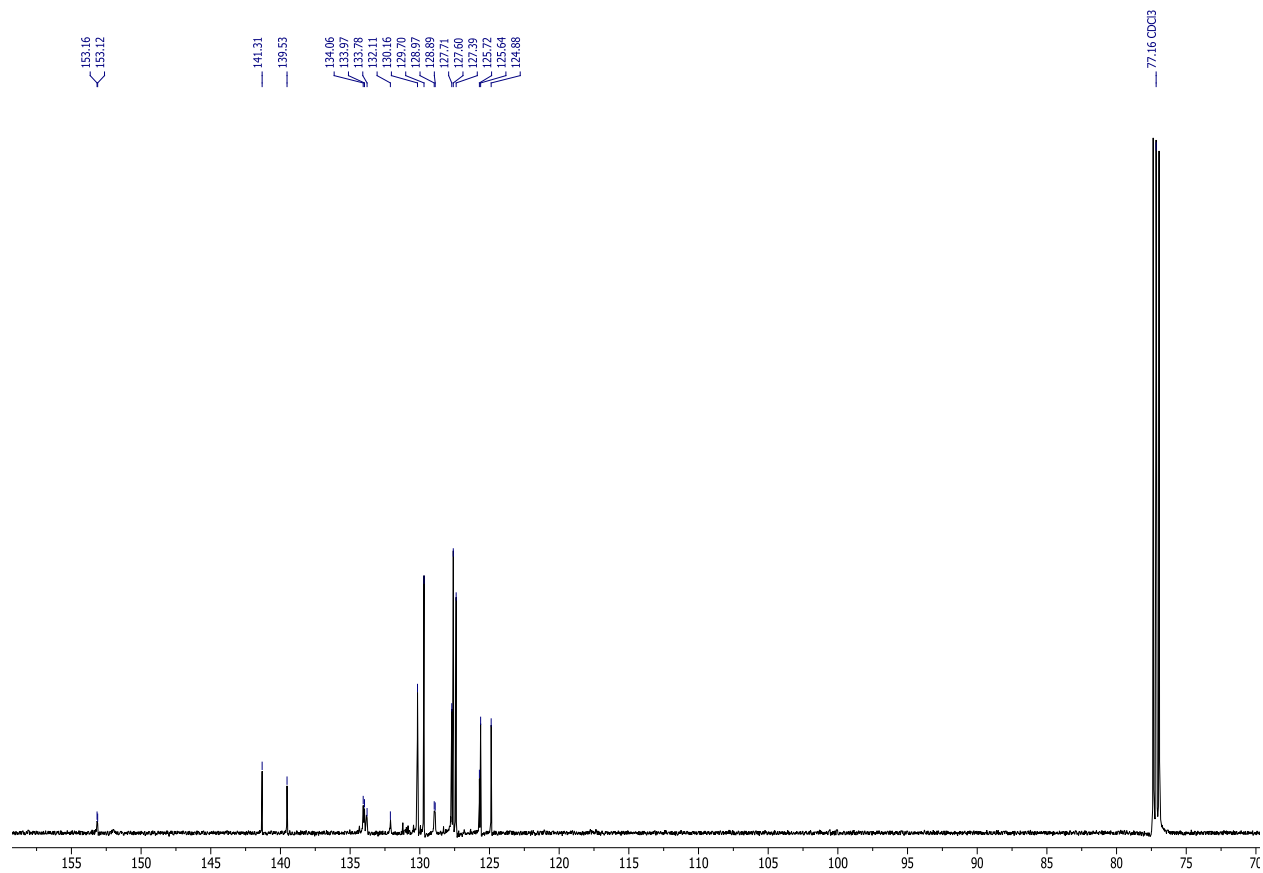

Figure S-30: FT-IR spectrum of **15**.

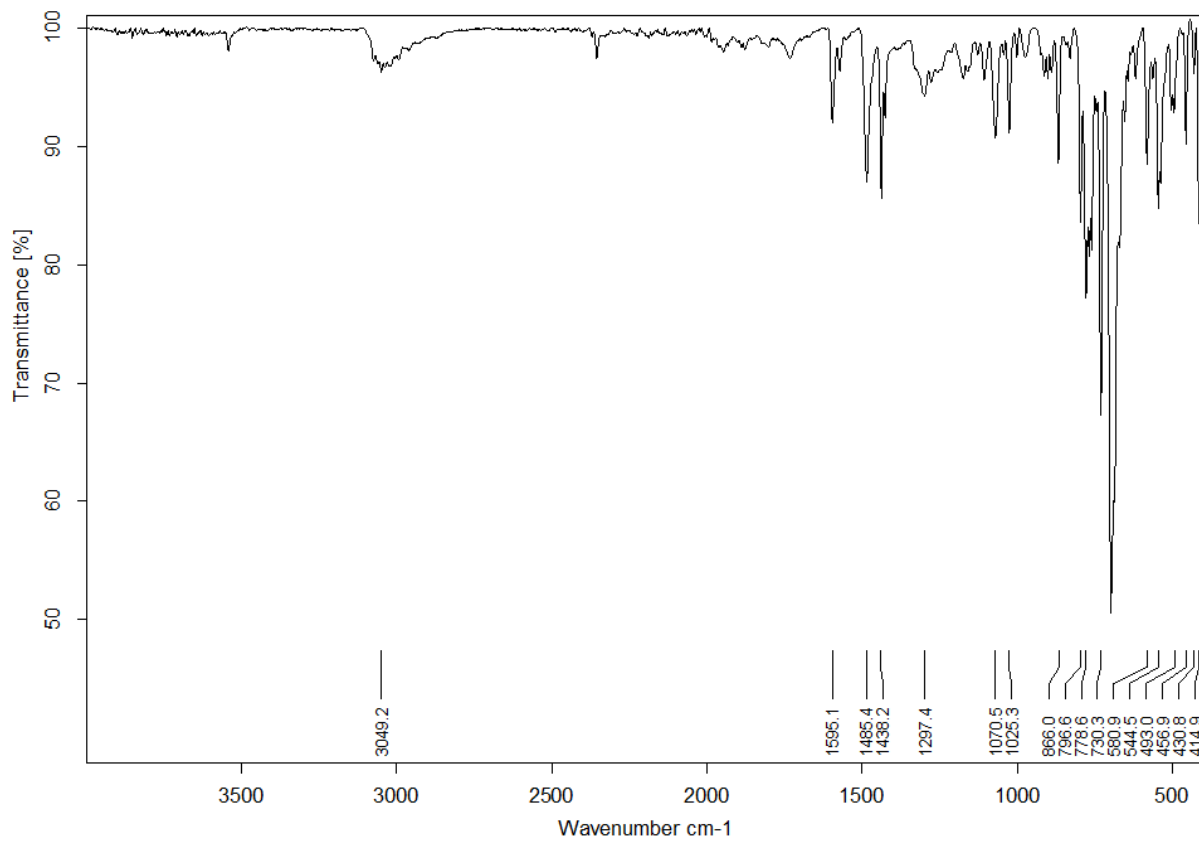



**X-Ray Crystallography details:** Crystals were selected under paratone oil, mounted on micromounts then immediately placed in a cold stream of N<sub>2</sub>. Structures were solved and refined using SHELXTL<sup>1</sup>. For compounds **12** and **15**, the *n*-pentane and *n*-hexane solvates were found to be disordered to an extent that could not be modeled and the contribution of the solvate was removed from the reflection data using the squeeze function in the PLATON software suite.<sup>2</sup> For compound **14**, the toluene solvent molecule in the unit cell was disordered on an inversion center and was removed from the reflection data using the squeeze function in the PLATON software suite.<sup>2</sup>

Table S-1: Crystallographic data for **11-15**.

| Compound                                            | <b>11</b>                          | <b>12</b>                                        | <b>13</b>                          | <b>14</b>                          | <b>15</b>                          |
|-----------------------------------------------------|------------------------------------|--------------------------------------------------|------------------------------------|------------------------------------|------------------------------------|
| CCDC                                                | 1443358                            | 1443359                                          | 1443360                            | 1443361                            | 1443362                            |
| Empirical formula                                   | C <sub>34</sub> H <sub>27</sub> BO | C <sub>68</sub> H <sub>52</sub> B <sub>2</sub> O | C <sub>44</sub> H <sub>33</sub> BS | C <sub>40</sub> H <sub>32</sub> BN | C <sub>40</sub> H <sub>32</sub> BP |
| FW (g/mol)                                          | 462.36                             | 906.71                                           | 604.57                             | 537.47                             | 554.43                             |
| Crystal system                                      | Monoclinic                         | Monoclinic                                       | Triclinic                          | Triclinic                          | Monoclinic                         |
| Space group                                         | <i>P2<sub>1</sub>/n</i>            | <i>C2/c</i>                                      | <i>P-1</i>                         | <i>P-1</i>                         | <i>C2/c</i>                        |
| <i>a</i> (Å)                                        | 16.1884(9)                         | 47.9860(16)                                      | 8.5301(6)                          | 10.1357(6)                         | 14.7877(6)                         |
| <i>b</i> (Å)                                        | 9.1325(6)                          | 10.1805(3)                                       | 9.7269(7)                          | 12.1343(7)                         | 12.3571(6)                         |
| <i>c</i> (Å)                                        | 18.4471(13)                        | 22.1076(7)                                       | 19.5345(15)                        | 14.8636(9)                         | 35.9892(16)                        |
| <i>α</i> (deg)                                      | 90                                 | 90                                               | 87.469(2)                          | 70.2320(17)                        | 90                                 |
| <i>β</i> (deg)                                      | 108.626(2)                         | 91.302(2)                                        | 86.921(2)                          | 73.1203(19)                        | 95.394(3)                          |
| <i>γ</i> (deg)                                      | 90                                 | 90                                               | 82.647(2)                          | 85.9647(18)                        | 90                                 |
| <i>V</i> (Å <sup>3</sup> )                          | 2584.4(3)                          | 10797.2(6)                                       | 1604.0(2)                          | 1645.44(17)                        | 6547.3(5)                          |
| <i>Z</i>                                            | 4                                  | 8                                                | 2                                  | 2                                  | 8                                  |
| <i>D<sub>c</sub></i> (mg m <sup>-3</sup> )          | 1.188                              | 1.230                                            | 1.252                              | 1.085                              | 1.125                              |
| radiation, <i>λ</i> (Å)                             | 0.71073                            | 0.71073                                          | 0.71073                            | 0.71073                            | 0.71073                            |
| temp (K)                                            | 150(2)                             | 150(2)                                           | 150(2)                             | 150(2)                             | 150(2)                             |
| <i>R1</i> [ <i>I</i> > 2σ( <i>I</i> )] <sup>a</sup> | 0.0529                             | 0.0876                                           | 0.0562                             | 0.0488                             | 0.0717                             |
| <i>wR2</i> ( <i>F</i> <sup>2</sup> ) <sup>a</sup>   | 0.1502                             | 0.1365                                           | 0.1539                             | 0.1279                             | 0.1297                             |
| GOF ( <i>S</i> ) <sup>a</sup>                       | 1.085                              | 1.047                                            | 1.055                              | 1.088                              | 1.124                              |

<sup>a</sup>  $R1(F[I > 2(I)]) = \sum ||F_o| - |F_c|| / \sum |F_o|$ ;  $wR2(F^2 [all data]) = [w(F_o^2 - F_c^2)^2]^{1/2}$ ;  $S(all data) = [w(F_o^2 - F_c^2)^2 / (n - p)]^{1/2}$  (*n* = no. of data; *p* = no. of parameters varied;  $w = 1/[^2(F_o^2) + (aP)^2 + bP]$  where  $P = (F_o^2 + 2F_c^2)/3$  and *a* and *b* are constants suggested by the refinement program.

References:

1. Sheldrick, G. M. *Acta Crystallogr.* **2008**, *A64*, 112.
2. Spek, A. L. *Acta Crystallogr.* **2009**, *D65*, 148.

### Cartesian Coordinates of M06-2X / 6-31+G(d) optimised geometries

#### Reactants

##### 2,3,4,5-tetramethyl-1-phenylborane

E<sub>SCF</sub> = -568.311763727 Hartree

Singlet, neutral

|   |           |           |           |
|---|-----------|-----------|-----------|
| 6 | 3.618646  | 1.497053  | -0.160491 |
| 6 | 2.316844  | 0.760468  | -0.063760 |
| 6 | 2.316835  | -0.760458 | 0.063713  |
| 6 | 1.064900  | -1.262522 | 0.081890  |
| 5 | 0.106853  | 0.000033  | 0.000157  |
| 6 | 1.064922  | 1.262574  | -0.081610 |
| 6 | 0.696584  | 2.711556  | -0.239272 |
| 1 | 1.534200  | 3.322980  | -0.589491 |
| 1 | -0.122103 | 2.831485  | -0.958302 |
| 1 | 0.351515  | 3.147895  | 0.707687  |
| 6 | -1.449007 | 0.000019  | 0.000076  |
| 6 | -2.180700 | -1.110302 | -0.461240 |
| 6 | -3.572946 | -1.109097 | -0.477689 |
| 6 | -4.271000 | -0.000047 | -0.000173 |
| 6 | -3.573081 | 1.109039  | 0.477457  |
| 6 | -2.180833 | 1.110312  | 0.461248  |
| 1 | -1.649250 | 1.984865  | 0.826872  |
| 1 | -4.114994 | 1.973220  | 0.851729  |
| 1 | -5.357700 | -0.000073 | -0.000268 |
| 1 | -4.114752 | -1.973298 | -0.852069 |
| 1 | -1.649010 | -1.984823 | -0.826788 |
| 6 | 0.696561  | -2.711492 | 0.239711  |
| 1 | 0.351834  | -3.148049 | -0.707275 |
| 1 | 1.534083  | -3.322807 | 0.590349  |
| 1 | -0.122356 | -2.831306 | 0.958494  |
| 6 | 3.618626  | -1.497107 | 0.160099  |
| 1 | 4.255380  | -1.279208 | -0.706217 |
| 1 | 4.181442  | -1.188278 | 1.050184  |
| 1 | 3.476222  | -2.578512 | 0.207183  |
| 1 | 4.181163  | 1.188255  | -1.050777 |
| 1 | 3.476294  | 2.578470  | -0.207459 |
| 1 | 4.255657  | 1.279053  | 0.705609  |

#### H<sub>2</sub>O

E<sub>SCF</sub> = -76.3837661933 Hartree

Singlet, neutral

|   |           |           |          |
|---|-----------|-----------|----------|
| 8 | 0.000000  | 0.116389  | 0.000000 |
| 1 | 0.770604  | -0.465524 | 0.000000 |
| 1 | -0.770604 | -0.465586 | 0.000000 |

#### thiophenol (PhSH))

E<sub>SCF</sub> = -630.296445793 Hartree

Singlet, neutral

|    |           |           |           |
|----|-----------|-----------|-----------|
| 16 | 2.282897  | -0.082928 | -0.004779 |
| 6  | 0.509059  | -0.000242 | 0.001300  |
| 6  | -0.197786 | -1.207061 | 0.002887  |
| 6  | -0.192317 | 1.208408  | -0.002003 |
| 6  | -1.589731 | -1.200157 | 0.000920  |
| 6  | -1.585463 | 1.205879  | -0.000996 |
| 1  | 0.344887  | 2.153096  | -0.005752 |
| 6  | -2.291334 | 0.004640  | -0.000416 |
| 1  | -2.118639 | 2.152200  | -0.002200 |
| 1  | -3.376766 | 0.007024  | -0.000585 |
| 1  | 0.341627  | -2.150493 | 0.007529  |
| 1  | -2.126949 | -2.144076 | 0.002144  |
| 1  | 2.494917  | 1.240294  | 0.065183  |

#### aniline (NH<sub>2</sub>Ph)

E<sub>SCF</sub> = -630.296445793 Hartree

Singlet, neutral

|   |           |           |           |
|---|-----------|-----------|-----------|
| 6 | -1.169737 | 1.200785  | 0.003859  |
| 6 | 0.221724  | 1.205853  | -0.005845 |
| 6 | 0.935284  | 0.000177  | -0.008908 |
| 6 | 0.221618  | -1.205811 | -0.005711 |
| 6 | -1.169516 | -1.200944 | 0.003493  |
| 6 | -1.878419 | 0.000047  | 0.008990  |
| 1 | -1.702940 | 2.147407  | 0.007372  |
| 1 | 0.764366  | 2.148303  | -0.017977 |
| 1 | 0.764869  | -2.147929 | -0.016868 |
| 1 | -1.703169 | -2.147315 | 0.006603  |
| 1 | -2.963562 | -0.000340 | 0.016804  |
| 7 | 2.332117  | -0.000105 | -0.076976 |
| 1 | 2.775217  | 0.835831  | 0.283241  |
| 1 | 2.774674  | -0.835867 | 0.284388  |

#### phenylphosphine (PH<sub>2</sub>Ph)

E<sub>SCF</sub> = -574.046105321 Hartree

Singlet, neutral

|    |           |           |           |
|----|-----------|-----------|-----------|
| 6  | 1.603028  | 1.216497  | -0.000002 |
| 6  | 0.211259  | 1.200131  | 0.000004  |
| 6  | -0.489442 | -0.013543 | 0.000008  |
| 6  | 0.236904  | -1.207998 | 0.000009  |
| 6  | 1.633143  | -1.195069 | -0.000001 |
| 6  | 2.317268  | 0.016775  | -0.000007 |
| 1  | 2.132277  | 2.165136  | -0.000005 |
| 1  | -0.336946 | 2.139189  | 0.000005  |
| 1  | -0.292995 | -2.157434 | 0.000019  |
| 1  | 2.182122  | -2.132233 | -0.000002 |
| 1  | 3.403303  | 0.030366  | -0.000013 |
| 15 | -2.334902 | -0.119903 | 0.000012  |
| 1  | -2.568604 | 0.826527  | 1.029332  |
| 1  | -2.568593 | 0.826241  | -1.029573 |

**H<sub>2</sub>O reaction**

Intermediate 1 (adduct)

E<sub>SCF</sub> = -644.711587639 Hartree

Singlet, neutral

|   |           |           |           |
|---|-----------|-----------|-----------|
| 5 | 0.123006  | 0.003940  | 0.502062  |
| 8 | 0.002850  | 0.142304  | 2.222232  |
| 1 | -0.796269 | 0.635972  | 2.477755  |
| 1 | 0.781089  | 0.647518  | 2.517137  |
| 6 | 0.986635  | 1.280213  | 0.029611  |
| 6 | 2.178712  | 0.802632  | -0.389626 |
| 6 | 3.313516  | 1.558792  | -1.021723 |
| 1 | 3.483664  | 1.219139  | -2.051508 |
| 1 | 3.125199  | 2.634508  | -1.053116 |
| 1 | 4.252753  | 1.396790  | -0.478531 |
| 6 | 2.288295  | -0.691261 | -0.192979 |
| 6 | 3.563153  | -1.404536 | -0.546958 |
| 1 | 3.827004  | -1.242587 | -1.599467 |
| 1 | 4.407674  | -1.036192 | 0.049823  |
| 1 | 3.483982  | -2.482411 | -0.387012 |
| 6 | 1.154254  | -1.212272 | 0.320306  |
| 6 | 0.920997  | -2.638356 | 0.727562  |
| 1 | 1.832197  | -3.245753 | 0.721889  |
| 1 | 0.497963  | -2.681726 | 1.740059  |
| 1 | 0.190469  | -3.134494 | 0.075294  |
| 6 | 0.504243  | 2.699958  | -0.059286 |
| 1 | 1.260687  | 3.394905  | -0.438097 |
| 1 | -0.372589 | 2.768845  | -0.716683 |
| 1 | 0.178447  | 3.083619  | 0.920266  |
| 6 | -1.409136 | -0.084486 | 0.057038  |
| 6 | -2.342331 | 0.881599  | 0.472405  |
| 1 | -2.016650 | 1.725404  | 1.086560  |
| 6 | -3.682535 | 0.832675  | 0.091397  |
| 1 | -4.376220 | 1.595613  | 0.435177  |
| 6 | -4.124541 | -0.188551 | -0.747869 |
| 1 | -5.165776 | -0.232126 | -1.055067 |
| 6 | -3.217002 | -1.146406 | -1.197960 |
| 1 | -3.550910 | -1.940075 | -1.861266 |
| 6 | -1.882933 | -1.093044 | -0.794273 |
| 1 | -1.188498 | -1.846815 | -1.157241 |

Transition State 1 (TS1, H-migration from Int1)

E<sub>SCF</sub> = -644.686180576 Hartree

Singlet, neutral

|   |           |           |           |
|---|-----------|-----------|-----------|
| 5 | -0.085790 | -0.303813 | 0.638245  |
| 8 | -0.115133 | -0.710160 | 2.199399  |
| 1 | 0.653738  | -0.335077 | 2.660668  |
| 1 | -0.825532 | 0.227491  | 1.884559  |
| 6 | -1.084968 | -1.311987 | -0.091965 |
| 6 | -2.206289 | -0.647475 | -0.453547 |
| 6 | -3.427615 | -1.182097 | -1.148375 |
| 1 | -3.648803 | -0.614198 | -2.060352 |

|   |           |           |           |
|---|-----------|-----------|-----------|
| 1 | -3.298467 | -2.228392 | -1.434312 |
| 1 | -4.315631 | -1.117475 | -0.506713 |
| 6 | -2.130626 | 0.777782  | -0.046524 |
| 6 | -3.114857 | 1.772406  | -0.584953 |
| 1 | -2.992305 | 1.878500  | -1.670999 |
| 1 | -4.143169 | 1.431406  | -0.417275 |
| 1 | -2.993221 | 2.756896  | -0.127929 |
| 6 | -1.057407 | 1.079036  | 0.745027  |
| 6 | -0.618508 | 2.486350  | 1.080740  |
| 1 | -1.389948 | 3.045401  | 1.624419  |
| 1 | 0.280530  | 2.475188  | 1.707563  |
| 1 | -0.364909 | 3.064540  | 0.182784  |
| 6 | -0.805164 | -2.774645 | -0.216967 |
| 1 | -1.625067 | -3.348205 | -0.660109 |
| 1 | 0.097791  | -2.941437 | -0.817847 |
| 1 | -0.595854 | -3.190364 | 0.778325  |
| 6 | 1.387264  | -0.060164 | 0.096320  |
| 6 | 2.470936  | -0.768919 | 0.633596  |
| 1 | 2.300147  | -1.483329 | 1.439041  |
| 6 | 3.768048  | -0.599269 | 0.145930  |
| 1 | 4.589913  | -1.161567 | 0.581669  |
| 6 | 4.005826  | 0.286907  | -0.901941 |
| 1 | 5.013084  | 0.424211  | -1.285208 |
| 6 | 2.940072  | 0.995521  | -1.458836 |
| 1 | 3.117547  | 1.687081  | -2.278351 |
| 6 | 1.650605  | 0.821725  | -0.961979 |
| 1 | 0.826262  | 1.378646  | -1.405496 |

Product 1 (Prod1, ring-open product)

E<sub>SCF</sub> = -644.768236585 Hartree

Singlet, neutral

|   |           |           |           |
|---|-----------|-----------|-----------|
| 6 | 0.061727  | 2.337356  | 2.050295  |
| 6 | -0.814997 | 1.287987  | 1.436032  |
| 6 | -1.381378 | 1.285143  | 0.217057  |
| 6 | -2.099324 | 0.076970  | -0.270466 |
| 6 | -1.554997 | -1.154378 | -0.141363 |
| 6 | -2.304917 | -2.400697 | -0.593332 |
| 1 | -3.250723 | -2.536182 | -0.053208 |
| 1 | -2.547891 | -2.357317 | -1.661421 |
| 1 | -1.708715 | -3.306384 | -0.441285 |
| 5 | -0.125682 | -1.384312 | 0.482021  |
| 8 | 0.025565  | -2.265467 | 1.525665  |
| 1 | -0.814880 | -2.614844 | 1.851923  |
| 6 | 1.208184  | -0.758781 | -0.065365 |
| 6 | 2.395062  | -0.873745 | 0.674123  |
| 1 | 2.375042  | -1.409599 | 1.620030  |
| 6 | 3.586766  | -0.311923 | 0.218622  |
| 6 | 3.613867  | 0.368775  | -0.998338 |
| 1 | 4.541706  | 0.805554  | -1.357767 |
| 6 | 2.447766  | 0.483064  | -1.756415 |
| 1 | 2.467434  | 1.005557  | -2.709069 |
| 6 | 1.260467  | -0.075291 | -1.288809 |
| 1 | 0.352398  | 0.016700  | -1.881708 |
| 1 | 4.494412  | -0.406085 | 0.808659  |
| 6 | -3.437037 | 0.324524  | -0.930355 |

|   |           |           |           |
|---|-----------|-----------|-----------|
| 1 | -4.036852 | -0.585579 | -0.995534 |
| 1 | -4.013587 | 1.075116  | -0.378424 |
| 1 | -3.304566 | 0.706057  | -1.951501 |
| 6 | -1.330030 | 2.446125  | -0.746280 |
| 1 | -2.335882 | 2.836596  | -0.941478 |
| 1 | -0.718187 | 3.269904  | -0.377133 |
| 1 | -0.916597 | 2.126961  | -1.711126 |
| 1 | -0.980129 | 0.410202  | 2.062083  |
| 1 | -0.281947 | 2.594512  | 3.058167  |
| 1 | 1.083701  | 1.946988  | 2.147072  |
| 1 | 0.112197  | 3.256360  | 1.463869  |

Product 2 (Prod2, ring-closed product)

E<sub>SCF</sub> = -644.787635586 Hartree

Singlet, neutral

|   |           |           |           |
|---|-----------|-----------|-----------|
| 6 | -0.077757 | 0.294173  | 0.792333  |
| 6 | -0.980014 | -0.935185 | 0.683744  |
| 6 | -0.656497 | -2.129637 | 1.532960  |
| 1 | -0.807698 | -1.903496 | 2.595973  |
| 1 | -1.263597 | -3.004328 | 1.289102  |
| 1 | 0.399883  | -2.401698 | 1.412123  |
| 6 | -1.984541 | -0.809263 | -0.204631 |
| 6 | -3.027949 | -1.835220 | -0.541730 |
| 1 | -4.025057 | -1.496792 | -0.233391 |
| 1 | -3.070348 | -1.994085 | -1.627361 |
| 1 | -2.844447 | -2.800295 | -0.064397 |
| 6 | -2.003208 | 0.523818  | -0.942577 |
| 1 | -1.712574 | 0.351709  | -1.995059 |
| 6 | -3.368701 | 1.229120  | -0.942661 |
| 1 | -3.721176 | 1.402910  | 0.080981  |
| 1 | -3.317666 | 2.201613  | -1.448019 |
| 1 | -4.133114 | 0.641130  | -1.462562 |
| 5 | -0.856091 | 1.299563  | -0.165568 |
| 8 | -0.582259 | 2.627670  | -0.187361 |
| 6 | 1.299039  | 0.038808  | 0.182079  |
| 6 | 2.465159  | 0.611659  | 0.705050  |
| 1 | 2.414610  | 1.230825  | 1.594726  |
| 6 | 3.704797  | 0.401202  | 0.101446  |
| 1 | 4.592845  | 0.855399  | 0.532505  |
| 6 | 3.809092  | -0.385179 | -1.043106 |
| 1 | 4.775105  | -0.549975 | -1.511228 |
| 6 | 2.657383  | -0.960029 | -1.578480 |
| 1 | 2.720443  | -1.578900 | -2.469439 |
| 6 | 1.421239  | -0.749425 | -0.972888 |
| 1 | 0.532362  | -1.214502 | -1.393961 |
| 6 | -0.004313 | 0.824982  | 2.232332  |
| 1 | -1.010633 | 0.877696  | 2.662718  |
| 1 | 0.605238  | 0.176846  | 2.874602  |
| 1 | 0.418275  | 1.834137  | 2.264126  |
| 1 | -1.136295 | 3.133683  | -0.797937 |

Product 3 (Prod3, bis-borole product)

E<sub>SCF</sub> = -1213.12019435 Hartree

Singlet, neutral

|   |           |           |           |
|---|-----------|-----------|-----------|
| 6 | 2.853151  | 1.883162  | -1.964085 |
| 6 | 2.118366  | 0.592382  | -1.755168 |
| 1 | 1.065324  | 0.701985  | -1.491745 |
| 6 | 2.597460  | -0.658133 | -1.858787 |
| 6 | 1.721986  | -1.813084 | -1.514670 |
| 6 | 1.006862  | -1.795348 | -0.368166 |
| 5 | 1.143357  | -0.626150 | 0.683844  |
| 8 | 0.000000  | 0.000000  | 1.091821  |
| 5 | -1.143357 | 0.626150  | 0.683844  |
| 6 | -1.006862 | 1.795348  | -0.368166 |
| 6 | -1.721986 | 1.813084  | -1.514670 |
| 6 | -2.597460 | 0.658133  | -1.858787 |
| 6 | -2.118366 | -0.592382 | -1.755168 |
| 1 | -1.065324 | -0.701985 | -1.491745 |
| 6 | -2.853151 | -1.883162 | -1.964085 |
| 1 | -3.799545 | -1.759585 | -2.494013 |
| 1 | -2.236363 | -2.588287 | -2.531407 |
| 1 | -3.071643 | -2.353841 | -0.996432 |
| 6 | -3.993981 | 0.992070  | -2.323705 |
| 1 | -3.974614 | 1.480072  | -3.305312 |
| 1 | -4.628012 | 0.108273  | -2.400945 |
| 1 | -4.476426 | 1.688656  | -1.628222 |
| 6 | -1.723613 | 2.935968  | -2.525732 |
| 1 | -2.697532 | 3.440046  | -2.538827 |
| 1 | -0.967414 | 3.693720  | -2.319832 |
| 1 | -1.553015 | 2.545646  | -3.535501 |
| 6 | 0.000000  | 2.853425  | 0.030919  |
| 1 | 0.224587  | 3.576199  | -0.756560 |
| 1 | -0.346805 | 3.414322  | 0.908229  |
| 1 | 0.944873  | 2.376996  | 0.322855  |
| 6 | -2.469319 | 0.262868  | 1.444930  |
| 6 | -3.645140 | 1.006921  | 1.274562  |
| 1 | -3.631008 | 1.865716  | 0.607391  |
| 6 | -4.816572 | 0.670852  | 1.944623  |
| 1 | -5.716579 | 1.261567  | 1.800739  |
| 6 | -4.832606 | -0.426330 | 2.804961  |
| 1 | -5.746022 | -0.693216 | 3.328699  |
| 6 | -3.674063 | -1.175152 | 2.997827  |
| 1 | -3.682432 | -2.025647 | 3.673182  |
| 6 | -2.505195 | -0.826645 | 2.326331  |
| 1 | -1.597479 | -1.403432 | 2.488158  |
| 6 | 2.469319  | -0.262868 | 1.444930  |
| 6 | 2.505195  | 0.826645  | 2.326331  |
| 1 | 1.597479  | 1.403432  | 2.488158  |
| 6 | 3.674063  | 1.175152  | 2.997827  |
| 1 | 3.682432  | 2.025647  | 3.673182  |
| 6 | 4.832606  | 0.426330  | 2.804961  |
| 1 | 5.746022  | 0.693216  | 3.328699  |
| 6 | 4.816572  | -0.670852 | 1.944623  |
| 1 | 5.716579  | -1.261567 | 1.800739  |
| 6 | 3.645140  | -1.006921 | 1.274562  |
| 1 | 3.631008  | -1.865716 | 0.607391  |
| 6 | 0.000000  | -2.853425 | 0.030919  |

|   |           |           |           |
|---|-----------|-----------|-----------|
| 1 | -0.944873 | -2.376996 | 0.322855  |
| 1 | -0.224587 | -3.576199 | -0.756560 |
| 1 | 0.346805  | -3.414322 | 0.908229  |
| 6 | 1.723613  | -2.935968 | -2.525732 |
| 1 | 1.553015  | -2.545646 | -3.535501 |
| 1 | 2.697532  | -3.440046 | -2.538827 |
| 1 | 0.967414  | -3.693720 | -2.319832 |
| 6 | 3.993981  | -0.992070 | -2.323705 |
| 1 | 4.628012  | -0.108273 | -2.400945 |
| 1 | 4.476426  | -1.688656 | -1.628222 |
| 1 | 3.974614  | -1.480072 | -3.305312 |
| 1 | 2.236363  | 2.588287  | -2.531407 |
| 1 | 3.071643  | 2.353841  | -0.996432 |
| 1 | 3.799545  | 1.759585  | -2.494013 |

Intermediate 3 (Ph migration)

E<sub>SCF</sub> = -644.678173148 Hartree

Singlet, neutral

|   |           |           |           |
|---|-----------|-----------|-----------|
| 6 | -0.122966 | -0.242751 | 0.894435  |
| 6 | -1.175870 | -1.150765 | 0.265019  |
| 6 | -1.039257 | -2.638388 | 0.390082  |
| 1 | -1.088510 | -2.969133 | 1.437850  |
| 1 | -1.820663 | -3.173659 | -0.156346 |
| 1 | -0.070172 | -2.982063 | -0.000747 |
| 6 | -2.177869 | -0.424755 | -0.296539 |
| 6 | -3.411163 | -0.984816 | -0.950713 |
| 1 | -4.314006 | -0.634427 | -0.434858 |
| 1 | -3.490958 | -0.645983 | -1.991206 |
| 1 | -3.427699 | -2.077239 | -0.950565 |
| 6 | -1.979533 | 1.050269  | -0.227813 |
| 6 | -2.945620 | 2.005689  | -0.871252 |
| 1 | -3.956197 | 1.934174  | -0.445539 |
| 1 | -2.632172 | 3.050265  | -0.742797 |
| 1 | -3.047858 | 1.835714  | -1.952438 |
| 5 | -0.761515 | 1.159342  | 0.510344  |
| 8 | 0.151881  | 2.397780  | 0.755254  |
| 6 | 1.222195  | -0.260228 | 0.194279  |
| 6 | 2.396859  | 0.162655  | 0.841511  |
| 1 | 2.386629  | 0.359464  | 1.911135  |
| 6 | 3.609438  | 0.278652  | 0.147855  |
| 1 | 4.502904  | 0.591954  | 0.681572  |
| 6 | 3.673997  | -0.023098 | -1.206515 |
| 1 | 4.613469  | 0.057961  | -1.744993 |
| 6 | 2.512953  | -0.443082 | -1.865199 |
| 1 | 2.549428  | -0.683922 | -2.924293 |
| 6 | 1.309714  | -0.552745 | -1.179777 |
| 1 | 0.404776  | -0.863251 | -1.697016 |
| 6 | -0.035548 | -0.494052 | 2.410340  |
| 1 | -1.048060 | -0.515306 | 2.825367  |
| 1 | 0.449706  | -1.453776 | 2.631219  |
| 1 | 0.517001  | 0.287679  | 2.944430  |
| 1 | -0.044537 | 3.107406  | 0.118521  |
| 1 | 1.085477  | 2.099684  | 0.622682  |

SPh reaction

Intermediate 1 (adduct)

E<sub>SCF</sub> = -1198.62846574 Hartree

Singlet, neutral

|    |           |           |           |
|----|-----------|-----------|-----------|
| 5  | 0.909672  | 0.196451  | 0.295373  |
| 6  | 0.204529  | 1.634782  | 0.277930  |
| 6  | -0.861127 | 1.545591  | 1.105885  |
| 6  | -1.873273 | 2.604244  | 1.438000  |
| 1  | -1.884737 | 2.821408  | 2.513425  |
| 1  | -1.678295 | 3.540468  | 0.909468  |
| 1  | -2.885602 | 2.270783  | 1.171708  |
| 6  | -0.987598 | 0.173169  | 1.707240  |
| 6  | -2.163644 | -0.167051 | 2.576738  |
| 1  | -2.231064 | 0.503912  | 3.442014  |
| 1  | -3.103508 | -0.062391 | 2.016769  |
| 1  | -2.108391 | -1.191791 | 2.952933  |
| 6  | 0.012244  | -0.646096 | 1.312919  |
| 6  | 0.143509  | -2.101532 | 1.669679  |
| 1  | -0.825570 | -2.584990 | 1.845194  |
| 1  | 0.655076  | -2.661652 | 0.874206  |
| 1  | 0.745103  | -2.251491 | 2.576594  |
| 6  | 0.643892  | 2.841210  | -0.498898 |
| 1  | 0.032891  | 3.728316  | -0.302496 |
| 1  | 1.686150  | 3.094809  | -0.266936 |
| 1  | 0.610851  | 2.655473  | -1.583482 |
| 6  | 2.464325  | -0.033683 | 0.052752  |
| 6  | 3.149627  | 0.531517  | -1.037675 |
| 1  | 2.598528  | 1.125244  | -1.765902 |
| 6  | 4.519910  | 0.354214  | -1.216132 |
| 1  | 5.019251  | 0.802282  | -2.071151 |
| 6  | 5.251324  | -0.393611 | -0.292762 |
| 1  | 6.320910  | -0.531343 | -0.425284 |
| 6  | 4.600133  | -0.959754 | 0.801202  |
| 1  | 5.162222  | -1.539814 | 1.528391  |
| 6  | 3.225103  | -0.784847 | 0.962595  |
| 1  | 2.733177  | -1.229772 | 1.824221  |
| 6  | -1.677307 | -0.646290 | -1.333418 |
| 6  | -2.421753 | 0.517233  | -1.526504 |
| 1  | -1.938975 | 1.420247  | -1.890673 |
| 6  | -3.784263 | 0.515319  | -1.230662 |
| 1  | -4.363549 | 1.422141  | -1.376912 |
| 6  | -4.398566 | -0.640401 | -0.752941 |
| 1  | -5.460223 | -0.638365 | -0.525350 |
| 6  | -3.646476 | -1.800649 | -0.566229 |
| 6  | -2.283376 | -1.805691 | -0.847730 |
| 1  | -1.693883 | -2.702409 | -0.674463 |
| 1  | -4.117801 | -2.703000 | -0.188415 |
| 16 | 0.070790  | -0.552082 | -1.635845 |
| 1  | 0.343153  | -1.863062 | -1.499125 |

## TS1 (H-migration from Int1)

E<sub>SCF</sub> = -1198.60693916 Hartree

Singlet, neutral

|    |           |           |           |
|----|-----------|-----------|-----------|
| 5  | -1.002452 | 0.247374  | 0.321311  |
| 6  | 0.005824  | -0.298765 | 1.395109  |
| 6  | 0.998233  | 0.619323  | 1.540499  |
| 6  | 2.257718  | 0.483971  | 2.346401  |
| 1  | 2.409126  | 1.350186  | 3.001358  |
| 1  | 2.236877  | -0.409224 | 2.974568  |
| 1  | 3.134079  | 0.412890  | 1.688013  |
| 6  | 0.762470  | 1.809704  | 0.702406  |
| 6  | 1.661635  | 3.001621  | 0.817934  |
| 1  | 1.563013  | 3.464271  | 1.808189  |
| 1  | 2.709394  | 2.692676  | 0.716350  |
| 1  | 1.450652  | 3.759802  | 0.062033  |
| 6  | -0.333755 | 1.676918  | -0.123682 |
| 6  | -0.969188 | 2.769130  | -0.946154 |
| 1  | -1.049051 | 2.486316  | -2.003346 |
| 1  | -1.986883 | 2.971509  | -0.592375 |
| 1  | -0.407593 | 3.706579  | -0.901324 |
| 6  | -0.006150 | -1.677796 | 1.982568  |
| 1  | 0.996063  | -2.044589 | 2.229150  |
| 1  | -0.606318 | -1.712571 | 2.901553  |
| 1  | -0.464965 | -2.381311 | 1.277206  |
| 6  | -2.517651 | -0.082509 | 0.101274  |
| 6  | -3.254148 | -0.685361 | 1.132610  |
| 1  | -2.756231 | -0.936497 | 2.066240  |
| 6  | -4.613972 | -0.960720 | 0.991045  |
| 1  | -5.162286 | -1.421953 | 1.807849  |
| 6  | -5.265911 | -0.649478 | -0.200134 |
| 1  | -6.323642 | -0.867999 | -0.317408 |
| 6  | -4.553097 | -0.057515 | -1.243861 |
| 1  | -5.054261 | 0.182677  | -2.177415 |
| 6  | -3.199495 | 0.226751  | -1.088089 |
| 1  | -2.658799 | 0.684467  | -1.914513 |
| 6  | 1.761899  | -0.899705 | -1.146015 |
| 6  | 2.346978  | -1.990637 | -0.487748 |
| 1  | 1.730325  | -2.847395 | -0.230221 |
| 6  | 3.701380  | -1.975196 | -0.169290 |
| 1  | 4.144402  | -2.829514 | 0.334845  |
| 6  | 4.489431  | -0.868232 | -0.492972 |
| 1  | 5.546362  | -0.859319 | -0.243165 |
| 6  | 3.913846  | 0.220543  | -1.144438 |
| 6  | 2.557849  | 0.205993  | -1.473126 |
| 1  | 2.112589  | 1.047355  | -1.998232 |
| 1  | 4.521544  | 1.081471  | -1.409850 |
| 16 | 0.034578  | -0.912635 | -1.541993 |
| 1  | -0.088770 | 0.627216  | -0.980186 |

## Product 1 (Prod1, ring opened product)

E<sub>SCF</sub> = -1198.66272915 Hartree

Singlet, neutral

|    |           |           |           |
|----|-----------|-----------|-----------|
| 6  | 2.226496  | 1.260946  | 2.661616  |
| 6  | 1.152376  | 1.373354  | 1.623141  |
| 6  | 1.255033  | 2.025426  | 0.453130  |
| 6  | 0.195038  | 1.921115  | -0.577426 |
| 6  | -0.314412 | 0.722210  | -0.951317 |
| 6  | -1.408541 | 0.665886  | -2.003082 |
| 1  | -2.360714 | 1.063047  | -1.625091 |
| 1  | -1.131504 | 1.259347  | -2.882830 |
| 1  | -1.597147 | -0.357662 | -2.338634 |
| 5  | 0.218826  | -0.613607 | -0.339821 |
| 16 | -0.924210 | -1.872147 | 0.320969  |
| 6  | -2.524804 | -1.075854 | 0.333100  |
| 6  | -2.758164 | 0.078811  | 1.084227  |
| 6  | -4.013353 | 0.682625  | 1.062879  |
| 6  | -5.047185 | 0.129518  | 0.307267  |
| 1  | -6.025100 | 0.601455  | 0.293132  |
| 6  | -4.821233 | -1.035819 | -0.423221 |
| 6  | -3.563897 | -1.637715 | -0.411681 |
| 1  | -3.379621 | -2.536913 | -0.993132 |
| 1  | -5.621938 | -1.475756 | -1.010627 |
| 1  | -4.183510 | 1.585409  | 1.642503  |
| 1  | -1.956008 | 0.512208  | 1.673832  |
| 6  | 1.729893  | -1.044289 | -0.361602 |
| 6  | 2.256834  | -2.008595 | 0.514684  |
| 1  | 1.607226  | -2.474003 | 1.253188  |
| 6  | 3.601821  | -2.369504 | 0.473736  |
| 1  | 3.985434  | -3.111185 | 1.168878  |
| 6  | 4.454164  | -1.779300 | -0.459161 |
| 1  | 5.502691  | -2.061670 | -0.495648 |
| 6  | 3.953899  | -0.825378 | -1.345030 |
| 1  | 4.611715  | -0.363711 | -2.076528 |
| 6  | 2.610021  | -0.462426 | -1.290183 |
| 1  | 2.230614  | 0.291330  | -1.977094 |
| 6  | -0.292804 | 3.213986  | -1.196670 |
| 1  | 0.081775  | 4.086239  | -0.654495 |
| 1  | 0.015633  | 3.308145  | -2.246207 |
| 1  | -1.388018 | 3.253598  | -1.181720 |
| 6  | 2.489674  | 2.819653  | 0.080974  |
| 1  | 2.335813  | 3.389720  | -0.839344 |
| 1  | 2.790802  | 3.520734  | 0.866031  |
| 1  | 3.329321  | 2.134664  | -0.096144 |
| 1  | 0.229966  | 0.832175  | 1.831599  |
| 1  | 3.018547  | 2.001507  | 2.524776  |
| 1  | 1.821036  | 1.369816  | 3.672648  |
| 1  | 2.691088  | 0.265996  | 2.602222  |

## Product 2 (Prod2, ring closed product)

E<sub>SCF</sub> = -1198.68090192 Hartree

Singlet, neutral

|    |           |           |           |
|----|-----------|-----------|-----------|
| 6  | -1.482594 | 0.481043  | 0.811685  |
| 6  | -1.775258 | 1.828011  | 0.146266  |
| 6  | -3.159263 | 2.396337  | 0.269363  |
| 1  | -3.360034 | 2.715680  | 1.299848  |
| 1  | -3.320458 | 3.259368  | -0.380758 |
| 1  | -3.907368 | 1.634222  | 0.018015  |
| 6  | -0.723792 | 2.365479  | -0.496548 |
| 6  | -0.692693 | 3.670870  | -1.239193 |
| 1  | -0.112766 | 4.423418  | -0.690774 |
| 1  | -0.205178 | 3.543791  | -2.214215 |
| 1  | -1.690128 | 4.082646  | -1.409736 |
| 6  | 0.549937  | 1.531493  | -0.426858 |
| 1  | 0.840850  | 1.216376  | -1.443889 |
| 6  | 1.737986  | 2.309287  | 0.172588  |
| 1  | 1.515654  | 2.626443  | 1.198587  |
| 1  | 2.645995  | 1.699869  | 0.192795  |
| 1  | 1.953551  | 3.208711  | -0.414952 |
| 5  | 0.062636  | 0.301847  | 0.444941  |
| 16 | 0.974111  | -1.115931 | 1.057114  |
| 6  | 2.597548  | -0.943872 | 0.325698  |
| 6  | 2.764114  | -1.005602 | -1.059537 |
| 6  | 4.034688  | -0.862274 | -1.613082 |
| 1  | 4.158090  | -0.902324 | -2.691473 |
| 6  | 5.143667  | -0.676710 | -0.787947 |
| 6  | 4.978591  | -0.641808 | 0.595811  |
| 6  | 3.708428  | -0.775461 | 1.154299  |
| 1  | 3.573047  | -0.733361 | 2.231300  |
| 1  | 5.838635  | -0.503463 | 1.244489  |
| 1  | 6.133004  | -0.566733 | -1.221706 |
| 1  | 1.899524  | -1.165048 | -1.698300 |
| 6  | -2.272641 | -0.643341 | 0.143571  |
| 6  | -2.898512 | -1.663393 | 0.867904  |
| 1  | -2.867709 | -1.660408 | 1.952792  |
| 6  | -3.571363 | -2.698771 | 0.217200  |
| 1  | -4.051228 | -3.476601 | 0.804799  |
| 6  | -3.631206 | -2.737998 | -1.172822 |
| 1  | -4.155365 | -3.543897 | -1.677970 |
| 6  | -3.011880 | -1.727974 | -1.909060 |
| 1  | -3.051936 | -1.741989 | -2.994829 |
| 6  | -2.343266 | -0.696105 | -1.257389 |
| 1  | -1.875325 | 0.094487  | -1.841165 |
| 6  | -1.712578 | 0.555408  | 2.331062  |
| 1  | -1.177736 | 1.416508  | 2.746412  |
| 1  | -2.777293 | 0.669526  | 2.570174  |
| 1  | -1.344246 | -0.339275 | 2.843957  |

## Intermediate 3 (Ph migration from Int1)

E<sub>SCF</sub> = -1198.5929058 Hartree

Singlet, neutral

|    |           |           |           |
|----|-----------|-----------|-----------|
| 5  | 0.035882  | 0.618515  | 0.470521  |
| 6  | 1.001063  | 0.163572  | -0.717013 |
| 6  | 1.780837  | 1.469496  | -0.897372 |
| 6  | 2.851158  | 1.541570  | -1.942803 |
| 1  | 3.396685  | 2.488476  | -1.917453 |
| 1  | 3.579715  | 0.730255  | -1.807804 |
| 1  | 2.435616  | 1.427261  | -2.953987 |
| 6  | 1.354602  | 2.441930  | -0.052307 |
| 6  | 1.877946  | 3.850103  | 0.024058  |
| 1  | 2.684220  | 4.035269  | -0.689430 |
| 1  | 1.079784  | 4.575596  | -0.177774 |
| 1  | 2.260271  | 4.072257  | 1.028208  |
| 6  | 0.259577  | 1.990923  | 0.844431  |
| 6  | -0.339167 | 2.914361  | 1.864604  |
| 1  | 0.404558  | 3.278664  | 2.586580  |
| 1  | -0.787589 | 3.805237  | 1.402743  |
| 1  | -1.135552 | 2.426561  | 2.442588  |
| 6  | 0.221681  | -0.151588 | -2.006835 |
| 1  | 0.892621  | -0.401637 | -2.839552 |
| 1  | -0.472474 | -0.991820 | -1.878343 |
| 1  | -0.368906 | 0.724000  | -2.297739 |
| 6  | 1.915747  | -0.970331 | -0.276741 |
| 6  | 2.814228  | -0.750639 | 0.781964  |
| 1  | 2.841379  | 0.236340  | 1.240579  |
| 6  | 3.653294  | -1.758755 | 1.238099  |
| 1  | 4.340610  | -1.558717 | 2.055924  |
| 6  | 3.616683  | -3.027183 | 0.649766  |
| 1  | 4.272748  | -3.816825 | 1.004578  |
| 6  | 2.733544  | -3.261705 | -0.396807 |
| 1  | 2.695507  | -4.239772 | -0.869345 |
| 6  | 1.892811  | -2.241790 | -0.856690 |
| 1  | 1.220774  | -2.451886 | -1.683417 |
| 6  | -2.733367 | -0.533795 | 0.449333  |
| 6  | -3.077303 | 0.583083  | -0.305285 |
| 1  | -2.382335 | 1.419014  | -0.371431 |
| 6  | -4.301821 | 0.592023  | -0.969731 |
| 1  | -4.585703 | 1.457894  | -1.560146 |
| 6  | -5.155744 | -0.508108 | -0.883769 |
| 1  | -6.106037 | -0.497676 | -1.409047 |
| 6  | -4.790904 | -1.624218 | -0.132492 |
| 6  | -3.569517 | -1.643336 | 0.540108  |
| 1  | -3.269692 | -2.509914 | 1.123064  |
| 1  | -5.452052 | -2.483276 | -0.072414 |
| 16 | -1.141413 | -0.590428 | 1.324214  |
| 1  | -1.493037 | 0.175292  | 2.376476  |



## Intermediate 2 (H migration from Int1)

E<sub>SCF</sub> = -1198.65663263 Hartree

Singlet, neutral

|    |           |           |           |
|----|-----------|-----------|-----------|
| 5  | -0.899049 | 0.195063  | -0.126033 |
| 6  | -0.207552 | 1.295856  | 0.748594  |
| 6  | 0.937907  | 1.832600  | -0.035432 |
| 6  | 1.817885  | 2.904361  | 0.540202  |
| 1  | 2.690959  | 3.104235  | -0.085081 |
| 1  | 1.266317  | 3.845868  | 0.656696  |
| 1  | 2.176443  | 2.629043  | 1.540180  |
| 6  | 1.060384  | 1.199759  | -1.223165 |
| 6  | 2.179167  | 1.350058  | -2.208286 |
| 1  | 2.860240  | 2.168695  | -1.964335 |
| 1  | 2.764958  | 0.420241  | -2.234727 |
| 1  | 1.795750  | 1.516241  | -3.221499 |
| 6  | -0.053319 | 0.202145  | -1.497453 |
| 6  | -0.958697 | 0.681604  | -2.650652 |
| 1  | -1.762298 | -0.039479 | -2.831325 |
| 1  | -1.426441 | 1.642510  | -2.403764 |
| 1  | -0.400035 | 0.810472  | -3.584941 |
| 6  | -0.819886 | 2.123624  | 1.850550  |
| 1  | -0.086563 | 2.444213  | 2.598588  |
| 1  | -1.258018 | 3.023084  | 1.398676  |
| 1  | -1.624750 | 1.582442  | 2.356859  |
| 6  | -2.405587 | -0.268273 | -0.005727 |
| 6  | -3.432423 | 0.687359  | 0.025464  |
| 1  | -3.175500 | 1.745852  | 0.025017  |
| 6  | -4.777315 | 0.315784  | 0.049924  |
| 1  | -5.551537 | 1.078138  | 0.072570  |
| 6  | -5.125723 | -1.033310 | 0.050124  |
| 1  | -6.171059 | -1.328449 | 0.073825  |
| 6  | -4.122796 | -2.003098 | 0.021905  |
| 1  | -4.386342 | -3.057463 | 0.024304  |
| 6  | -2.783826 | -1.619234 | -0.008125 |
| 1  | -2.010358 | -2.385862 | -0.024009 |
| 6  | 1.807174  | -0.975507 | 0.829707  |
| 6  | 2.976647  | -0.304257 | 1.197773  |
| 1  | 2.921422  | 0.526350  | 1.894754  |
| 6  | 4.203078  | -0.702881 | 0.673094  |
| 1  | 5.107368  | -0.172469 | 0.956755  |
| 6  | 4.270947  | -1.783803 | -0.206570 |
| 1  | 5.228957  | -2.095421 | -0.612094 |
| 6  | 3.108330  | -2.468370 | -0.556985 |
| 6  | 1.877096  | -2.062210 | -0.045533 |
| 1  | 0.964883  | -2.582697 | -0.325044 |
| 1  | 3.156168  | -3.315801 | -1.234461 |
| 16 | 0.233091  | -0.500169 | 1.503188  |
| 1  | 0.376286  | -0.765604 | -1.794250 |

NH<sub>2</sub>Ph reaction

Intermediate 1 (adduct)

E<sub>SCF</sub> = -855.827803989 Hartree

Singlet, neutral

|   |           |           |           |
|---|-----------|-----------|-----------|
| 7 | -0.222563 | -1.464846 | -0.434711 |
| 5 | 0.577013  | -0.036937 | -0.068754 |
| 6 | 0.180785  | 1.053973  | -1.188183 |
| 6 | -0.474132 | 2.055677  | -0.563381 |
| 6 | -1.011412 | 3.327493  | -1.158857 |
| 1 | -0.548427 | 4.209999  | -0.699627 |
| 1 | -0.832808 | 3.382754  | -2.235725 |
| 1 | -2.092745 | 3.416275  | -0.992053 |
| 6 | -0.631220 | 1.782200  | 0.906406  |
| 6 | -1.331141 | 2.781406  | 1.785863  |
| 1 | -0.838274 | 3.761050  | 1.748484  |
| 1 | -2.367382 | 2.936051  | 1.459127  |
| 1 | -1.357523 | 2.460797  | 2.829968  |
| 6 | -0.077585 | 0.601071  | 1.259128  |
| 6 | 0.007302  | 0.026231  | 2.643115  |
| 1 | -0.442623 | 0.662828  | 3.412283  |
| 1 | -0.491103 | -0.952197 | 2.708036  |
| 1 | 1.055558  | -0.147761 | 2.923638  |
| 6 | 0.554484  | 0.972157  | -2.638599 |
| 1 | 0.158868  | 1.793153  | -3.246444 |
| 1 | 1.646410  | 0.962297  | -2.755296 |
| 1 | 0.198917  | 0.034689  | -3.100815 |
| 6 | 2.146079  | -0.405215 | -0.003557 |
| 6 | 2.748628  | -1.455653 | -0.713443 |
| 1 | 2.150408  | -2.114151 | -1.346682 |
| 6 | 4.123624  | -1.699114 | -0.661763 |
| 1 | 4.550127  | -2.524792 | -1.225718 |
| 6 | 4.944897  | -0.879141 | 0.106289  |
| 1 | 6.014872  | -1.061534 | 0.151882  |
| 6 | 4.377600  | 0.181818  | 0.814697  |
| 1 | 5.009003  | 0.831698  | 1.415271  |
| 6 | 3.004579  | 0.406538  | 0.758921  |
| 1 | 2.575555  | 1.238051  | 1.316177  |
| 6 | -1.670354 | -1.441679 | -0.297639 |
| 6 | -2.434824 | -0.748734 | -1.231446 |
| 1 | -1.952664 | -0.236549 | -2.057890 |
| 6 | -3.818020 | -0.701643 | -1.073249 |
| 1 | -4.418217 | -0.159340 | -1.797336 |
| 6 | -4.428779 | -1.338789 | 0.005689  |
| 1 | -5.506863 | -1.294906 | 0.124904  |
| 6 | -3.651891 | -2.036810 | 0.927979  |
| 6 | -2.268583 | -2.092877 | 0.775524  |
| 1 | -1.659724 | -2.636418 | 1.493890  |
| 1 | -4.118943 | -2.540589 | 1.768471  |
| 1 | 0.171557  | -2.195083 | 0.164550  |
| 1 | 0.028669  | -1.721157 | -1.393313 |

## TS 1 (H-migration from Int1)

E<sub>SCF</sub> = -855.780235608 Hartree

Singlet, neutral

|   |           |           |           |
|---|-----------|-----------|-----------|
| 7 | -0.722062 | -0.650195 | 1.058617  |
| 5 | 0.472262  | 0.029648  | 0.186075  |
| 6 | -0.083461 | 0.837818  | -1.070537 |
| 6 | 0.114952  | 2.165772  | -0.886686 |
| 6 | -0.227227 | 3.289677  | -1.825503 |
| 1 | -0.660452 | 2.915253  | -2.755544 |
| 1 | -0.947189 | 3.984817  | -1.374662 |
| 1 | 0.661837  | 3.876403  | -2.087283 |
| 6 | 0.753054  | 2.438422  | 0.418906  |
| 6 | 1.329597  | 3.793219  | 0.709180  |
| 1 | 2.170917  | 4.002699  | 0.035435  |
| 1 | 0.585407  | 4.579132  | 0.535476  |
| 1 | 1.687491  | 3.873331  | 1.737857  |
| 6 | 0.870657  | 1.345550  | 1.231735  |
| 6 | 1.723761  | 1.299215  | 2.478383  |
| 1 | 1.412166  | 2.039356  | 3.225198  |
| 1 | 1.663226  | 0.312559  | 2.951536  |
| 1 | 2.783773  | 1.477511  | 2.256614  |
| 6 | -0.698135 | 0.172429  | -2.263937 |
| 1 | -1.338472 | -0.662825 | -1.956033 |
| 1 | -1.297757 | 0.846499  | -2.883925 |
| 1 | 0.093328  | -0.258173 | -2.892187 |
| 6 | 1.713161  | -0.951905 | -0.037407 |
| 6 | 1.514835  | -2.331708 | -0.182944 |
| 1 | 0.506742  | -2.739681 | -0.107845 |
| 6 | 2.577053  | -3.200120 | -0.442284 |
| 1 | 2.392705  | -4.265622 | -0.552180 |
| 6 | 3.871072  | -2.699372 | -0.562976 |
| 1 | 4.702143  | -3.370716 | -0.760069 |
| 6 | 4.091418  | -1.327380 | -0.430224 |
| 1 | 5.097562  | -0.927656 | -0.526123 |
| 6 | 3.024173  | -0.470913 | -0.171049 |
| 1 | 3.207617  | 0.598246  | -0.073208 |
| 6 | -2.079416 | -0.775834 | 0.684150  |
| 6 | -2.818525 | 0.354600  | 0.315290  |
| 1 | -2.342396 | 1.330923  | 0.334888  |
| 6 | -4.147939 | 0.222335  | -0.075350 |
| 1 | -4.706750 | 1.107209  | -0.366681 |
| 6 | -4.768228 | -1.026913 | -0.078465 |
| 1 | -5.807338 | -1.123290 | -0.377213 |
| 6 | -4.041416 | -2.148929 | 0.316076  |
| 6 | -2.705771 | -2.026954 | 0.691310  |
| 1 | -2.136857 | -2.908120 | 0.980489  |
| 1 | -4.510875 | -3.128476 | 0.324234  |
| 1 | -0.209709 | 0.522221  | 1.463491  |
| 1 | -0.395684 | -1.432541 | 1.621028  |

## Product 1 (Prod1, ring opened product)

E<sub>SCF</sub> = -855.857441688 Hartree

Singlet, neutral

|   |           |           |           |
|---|-----------|-----------|-----------|
| 6 | 1.829924  | 0.747178  | 2.998271  |
| 6 | 1.056163  | 1.183218  | 1.790160  |
| 6 | 1.507059  | 1.840177  | 0.707105  |
| 6 | 0.604859  | 2.073260  | -0.452316 |
| 6 | -0.145818 | 1.068408  | -0.957787 |
| 6 | -1.099660 | 1.302713  | -2.119790 |
| 1 | -1.849328 | 2.071633  | -1.896604 |
| 1 | -0.555992 | 1.626325  | -3.016351 |
| 1 | -1.645310 | 0.390134  | -2.377618 |
| 5 | 0.003142  | -0.411064 | -0.440435 |
| 7 | -1.124884 | -1.207425 | -0.099068 |
| 1 | -0.966336 | -2.206045 | -0.009824 |
| 6 | -2.481340 | -0.862171 | 0.063196  |
| 6 | -2.876935 | 0.429733  | 0.431295  |
| 6 | -4.228188 | 0.730626  | 0.580836  |
| 6 | -5.204526 | -0.245390 | 0.387312  |
| 1 | -6.255653 | -0.004550 | 0.511271  |
| 6 | -4.811882 | -1.537248 | 0.040281  |
| 6 | -3.464460 | -1.842615 | -0.123188 |
| 1 | -3.164444 | -2.848907 | -0.407792 |
| 1 | -5.557139 | -2.313025 | -0.110409 |
| 1 | -4.516846 | 1.738625  | 0.865361  |
| 1 | -2.125248 | 1.193148  | 0.605594  |
| 6 | 1.402325  | -1.147045 | -0.435128 |
| 6 | 1.685432  | -2.194646 | 0.456160  |
| 1 | 0.936789  | -2.494393 | 1.189087  |
| 6 | 2.921205  | -2.839445 | 0.457167  |
| 1 | 3.117991  | -3.637458 | 1.168106  |
| 6 | 3.906492  | -2.454688 | -0.451662 |
| 1 | 4.870229  | -2.956221 | -0.457101 |
| 6 | 3.648870  | -1.419711 | -1.350072 |
| 1 | 4.411989  | -1.115434 | -2.061543 |
| 6 | 2.414217  | -0.773277 | -1.333034 |
| 1 | 2.227200  | 0.042665  | -2.028752 |
| 6 | 0.609685  | 3.471220  | -1.029043 |
| 1 | 0.660516  | 4.225722  | -0.236258 |
| 1 | 1.482677  | 3.624271  | -1.677785 |
| 1 | -0.281176 | 3.666740  | -1.629816 |
| 6 | 2.917013  | 2.351983  | 0.546950  |
| 1 | 2.925439  | 3.435831  | 0.383307  |
| 1 | 3.544226  | 2.139760  | 1.413646  |
| 1 | 3.385795  | 1.887744  | -0.330395 |
| 1 | 0.001764  | 0.902209  | 1.799038  |
| 1 | 2.843836  | 1.150059  | 3.029798  |
| 1 | 1.316126  | 1.043119  | 3.919478  |
| 1 | 1.908762  | -0.348331 | 3.010949  |

## Product 2 (Prod2, ring closed product)

E<sub>SCF</sub> = -855.877016076 Hartree

Singlet, neutral

|   |           |           |           |
|---|-----------|-----------|-----------|
| 6 | -1.335471 | 0.297141  | 0.776613  |
| 6 | -1.981278 | 1.580836  | 0.253541  |
| 6 | -3.449130 | 1.792583  | 0.489554  |
| 1 | -3.656068 | 1.932522  | 1.558317  |
| 1 | -3.841181 | 2.664531  | -0.038936 |
| 1 | -4.019013 | 0.912694  | 0.166547  |
| 6 | -1.122285 | 2.421142  | -0.350709 |
| 6 | -1.437068 | 3.772222  | -0.926589 |
| 1 | -0.991365 | 4.570554  | -0.320060 |
| 1 | -1.012046 | 3.865941  | -1.934146 |
| 1 | -2.510001 | 3.966890  | -0.991717 |
| 6 | 0.313930  | 1.919705  | -0.413588 |
| 1 | 0.623726  | 1.869204  | -1.470470 |
| 6 | 1.294687  | 2.852112  | 0.326279  |
| 1 | 0.984682  | 2.981857  | 1.370071  |
| 1 | 2.312013  | 2.447381  | 0.327271  |
| 1 | 1.330703  | 3.845697  | -0.134843 |
| 5 | 0.175050  | 0.486336  | 0.262197  |
| 6 | 2.511606  | -0.588321 | 0.173457  |
| 6 | 3.061484  | 0.126022  | -0.895912 |
| 6 | 4.422251  | 0.030671  | -1.175060 |
| 1 | 4.832459  | 0.593386  | -2.008773 |
| 6 | 5.251837  | -0.787815 | -0.410269 |
| 6 | 4.701665  | -1.516818 | 0.642765  |
| 6 | 3.344918  | -1.416316 | 0.934585  |
| 1 | 2.923031  | -1.976642 | 1.766013  |
| 1 | 5.330931  | -2.164508 | 1.246343  |
| 1 | 6.310776  | -0.862257 | -0.636579 |
| 1 | 2.420669  | 0.740784  | -1.517772 |
| 6 | -1.941620 | -0.946881 | 0.142176  |
| 6 | -2.251351 | -2.101669 | 0.869564  |
| 1 | -2.112659 | -2.122244 | 1.946385  |
| 6 | -2.756353 | -3.240331 | 0.236229  |
| 1 | -2.991289 | -4.121365 | 0.827359  |
| 6 | -2.965476 | -3.247427 | -1.138759 |
| 1 | -3.360550 | -4.131407 | -1.630518 |
| 6 | -2.665699 | -2.101803 | -1.878493 |
| 1 | -2.826715 | -2.090077 | -2.953002 |
| 6 | -2.160981 | -0.971738 | -1.245243 |
| 1 | -1.937562 | -0.080369 | -1.829061 |
| 6 | -1.384803 | 0.266985  | 2.315694  |
| 1 | -1.000626 | 1.209779  | 2.719696  |
| 1 | -2.408648 | 0.132209  | 2.687193  |
| 1 | -0.772406 | -0.541086 | 2.733306  |
| 7 | 1.139433  | -0.511994 | 0.493244  |
| 1 | 0.814660  | -1.332998 | 0.998659  |

## Intermediate 3 (Ph migration from Int1)

E<sub>SCF</sub> = -855.798569123 Hartree

Singlet, neutral

|   |           |           |           |
|---|-----------|-----------|-----------|
| 6 | -1.646752 | 0.004182  | 0.801565  |
| 6 | -2.539214 | 0.837739  | -0.108147 |
| 6 | -3.938045 | 0.381733  | -0.393167 |
| 1 | -4.547906 | 0.336936  | 0.521152  |
| 1 | -4.455348 | 1.039286  | -1.097237 |
| 1 | -3.944099 | -0.631438 | -0.821919 |
| 6 | -1.897693 | 1.956430  | -0.533215 |
| 6 | -2.483571 | 3.025716  | -1.414684 |
| 1 | -2.449006 | 4.001901  | -0.914879 |
| 1 | -1.907859 | 3.127565  | -2.343191 |
| 1 | -3.523024 | 2.824378  | -1.684766 |
| 6 | -0.495896 | 2.066860  | -0.049556 |
| 6 | 0.371591  | 3.217675  | -0.481011 |
| 1 | -0.010540 | 4.186600  | -0.128209 |
| 1 | 1.394566  | 3.119754  | -0.101431 |
| 1 | 0.445616  | 3.292915  | -1.575385 |
| 5 | -0.319178 | 0.904295  | 0.775471  |
| 6 | -1.253332 | -1.330259 | 0.201126  |
| 6 | -0.933861 | -2.445195 | 0.991092  |
| 1 | -1.103686 | -2.418549 | 2.065067  |
| 6 | -0.429270 | -3.622027 | 0.422705  |
| 1 | -0.194425 | -4.468067 | 1.063406  |
| 6 | -0.245300 | -3.715112 | -0.951544 |
| 1 | 0.138084  | -4.628888 | -1.395986 |
| 6 | -0.577951 | -2.618558 | -1.756478 |
| 1 | -0.447616 | -2.678360 | -2.833915 |
| 6 | -1.067845 | -1.449316 | -1.189843 |
| 1 | -1.301157 | -0.589584 | -1.814012 |
| 6 | -2.267481 | -0.112628 | 2.204082  |
| 1 | -2.585463 | 0.880496  | 2.537662  |
| 1 | -3.143194 | -0.775982 | 2.210153  |
| 1 | -1.567691 | -0.500694 | 2.957577  |
| 7 | 0.958105  | 0.335078  | 1.538116  |
| 1 | 1.125212  | 0.864191  | 2.397312  |
| 6 | 2.189735  | 0.282128  | 0.748630  |
| 6 | 3.168904  | 1.246968  | 0.938761  |
| 6 | 2.334006  | -0.733707 | -0.190661 |
| 6 | 4.324285  | 1.200401  | 0.158593  |
| 1 | 3.028960  | 2.035683  | 1.674343  |
| 6 | 3.494942  | -0.774360 | -0.956418 |
| 1 | 1.545262  | -1.470847 | -0.328892 |
| 6 | 4.488596  | 0.191390  | -0.786724 |
| 1 | 5.092750  | 1.954905  | 0.294361  |
| 1 | 3.618803  | -1.563008 | -1.691951 |
| 1 | 5.389167  | 0.156281  | -1.391706 |
| 1 | 0.716664  | -0.622861 | 1.827633  |

|                                           |           |           |           |          |          |
|-------------------------------------------|-----------|-----------|-----------|----------|----------|
| Product 3 (Prod3, Bisborole)              |           | 6         | -3.091526 | 1.266959 | 0.842284 |
|                                           |           | 1         | -2.357092 | 1.485264 | 1.615783 |
| E <sub>SCF</sub> = -1424.20745325 Hartree |           | 6         | -4.411946 | 1.666500 | 1.029794 |
| Singlet, neutral                          |           | 1         | -4.700729 | 2.175257 | 1.945525 |
| 6                                         | -2.744843 | -2.444425 | 2.459307  |          |          |
| 6                                         | -1.976970 | -2.385551 | 1.173227  |          |          |
| 1                                         | -0.912744 | -2.168454 | 1.243961  |          |          |
| 6                                         | -2.483823 | -2.567264 | -0.056817 |          |          |
| 6                                         | -1.619006 | -2.363109 | -1.243821 |          |          |
| 6                                         | -0.944972 | -1.201076 | -1.398907 |          |          |
| 5                                         | -1.203987 | 0.067496  | -0.495415 |          |          |
| 7                                         | -0.085162 | 0.843616  | -0.003041 |          |          |
| 5                                         | 1.214302  | 0.260228  | 0.403352  |          |          |
| 6                                         | 1.240849  | -0.840783 | 1.526046  |          |          |
| 6                                         | 2.088069  | -1.898485 | 1.545822  |          |          |
| 6                                         | 2.908995  | -2.255964 | 0.366374  |          |          |
| 6                                         | 2.320960  | -2.428396 | -0.828579 |          |          |
| 1                                         | 1.235944  | -2.353069 | -0.867300 |          |          |
| 6                                         | 3.031298  | -2.717274 | -2.117305 |          |          |
| 1                                         | 4.056891  | -3.062316 | -1.959489 |          |          |
| 1                                         | 2.499877  | -3.476639 | -2.701540 |          |          |
| 1                                         | 3.078028  | -1.809964 | -2.735879 |          |          |
| 6                                         | 4.403213  | -2.409480 | 0.567924  |          |          |
| 1                                         | 4.692196  | -2.180637 | 1.598011  |          |          |
| 1                                         | 4.750600  | -3.423575 | 0.338114  |          |          |
| 1                                         | 4.944142  | -1.713152 | -0.083133 |          |          |
| 6                                         | 2.212424  | -2.806168 | 2.751385  |          |          |
| 1                                         | 2.352439  | -2.243514 | 3.681110  |          |          |
| 1                                         | 1.297493  | -3.402954 | 2.866986  |          |          |
| 1                                         | 3.043085  | -3.508324 | 2.642152  |          |          |
| 6                                         | 0.366322  | -0.557883 | 2.738840  |          |          |
| 1                                         | 0.028821  | -1.469248 | 3.244336  |          |          |
| 1                                         | 0.914614  | 0.038042  | 3.483123  |          |          |
| 1                                         | -0.524136 | 0.015130  | 2.457904  |          |          |
| 6                                         | 2.538784  | 0.944344  | -0.109322 |          |          |
| 6                                         | 3.739411  | 0.868817  | 0.614430  |          |          |
| 1                                         | 3.753132  | 0.332959  | 1.561553  |          |          |
| 6                                         | 4.909296  | 1.467809  | 0.151196  |          |          |
| 1                                         | 5.823010  | 1.401528  | 0.736024  |          |          |
| 6                                         | 4.906002  | 2.149929  | -1.064912 |          |          |
| 1                                         | 5.816986  | 2.614238  | -1.432714 |          |          |
| 6                                         | 3.725713  | 2.241832  | -1.803610 |          |          |
| 1                                         | 3.715018  | 2.778483  | -2.748267 |          |          |
| 6                                         | 2.558403  | 1.655608  | -1.321493 |          |          |
| 1                                         | 1.637918  | 1.754556  | -1.893627 |          |          |
| 6                                         | -0.197698 | 2.259506  | 0.146600  |          |          |
| 6                                         | -0.794300 | 3.044661  | -0.846884 |          |          |
| 6                                         | -0.901116 | 4.422497  | -0.690070 |          |          |
| 6                                         | -0.395766 | 5.045051  | 0.451779  |          |          |
| 6                                         | 0.214421  | 4.272244  | 1.437215  |          |          |
| 6                                         | 0.307287  | 2.890174  | 1.289145  |          |          |
| 1                                         | 0.769028  | 2.289690  | 2.070503  |          |          |
| 1                                         | 0.615705  | 4.742859  | 2.330226  |          |          |
| 1                                         | -0.474056 | 6.121567  | 0.569160  |          |          |
| 1                                         | -1.373895 | 5.013709  | -1.469133 |          |          |
| 1                                         | -1.175414 | 2.563443  | -1.744339 |          |          |
| 6                                         | -2.686666 | 0.591227  | -0.321474 |          |          |

**PH<sub>2</sub>Ph reaction**

Intermediate 1 (adduct)

E<sub>SCF</sub> = -1142.39033135 Hartree

Singlet, neutral

|    |           |           |           |
|----|-----------|-----------|-----------|
| 15 | -0.019809 | -0.223255 | 1.497999  |
| 5  | 0.957082  | 0.020152  | -0.242691 |
| 6  | 0.229046  | -1.154184 | -1.064207 |
| 6  | -0.798194 | -0.584171 | -1.747776 |
| 6  | -1.818694 | -1.261009 | -2.620030 |
| 1  | -1.778369 | -0.882077 | -3.648863 |
| 1  | -1.675244 | -2.343745 | -2.657706 |
| 1  | -2.835228 | -1.069845 | -2.250226 |
| 6  | -0.865396 | 0.880703  | -1.519667 |
| 6  | -1.984768 | 1.698619  | -2.100068 |
| 1  | -2.049124 | 1.578637  | -3.188360 |
| 1  | -2.952869 | 1.382701  | -1.685713 |
| 1  | -1.859748 | 2.763846  | -1.888376 |
| 6  | 0.130073  | 1.317831  | -0.705133 |
| 6  | 0.307452  | 2.739708  | -0.237793 |
| 1  | 0.833747  | 3.348367  | -0.986025 |
| 1  | -0.645889 | 3.244369  | -0.032577 |
| 1  | 0.913151  | 2.786516  | 0.675920  |
| 6  | 0.606105  | -2.607362 | -1.055103 |
| 1  | -0.010787 | -3.219001 | -1.721705 |
| 1  | 1.653858  | -2.736395 | -1.355356 |
| 1  | 0.525939  | -3.044661 | -0.047128 |
| 6  | 2.528021  | 0.020942  | 0.055960  |
| 6  | 3.171856  | -1.054963 | 0.691565  |
| 1  | 2.586125  | -1.917101 | 1.011157  |
| 6  | 4.547258  | -1.062509 | 0.917952  |
| 1  | 5.012351  | -1.912149 | 1.411200  |
| 6  | 5.325905  | 0.019060  | 0.506828  |
| 1  | 6.398637  | 0.018628  | 0.679005  |
| 6  | 4.715273  | 1.097930  | -0.130016 |
| 1  | 5.313455  | 1.943315  | -0.460186 |
| 6  | 3.336850  | 1.095266  | -0.346125 |
| 1  | 2.878382  | 1.941977  | -0.851826 |
| 6  | -1.826962 | -0.186626 | 1.375678  |
| 6  | -2.518496 | -1.312790 | 0.919966  |
| 1  | -1.982481 | -2.236152 | 0.712482  |
| 6  | -3.894689 | -1.246398 | 0.709816  |
| 1  | -4.427759 | -2.123266 | 0.354474  |
| 6  | -4.581364 | -0.056428 | 0.946573  |
| 1  | -5.653062 | -0.005755 | 0.778137  |
| 6  | -3.893041 | 1.069448  | 1.398185  |
| 6  | -2.517989 | 1.005906  | 1.610184  |
| 1  | -1.980889 | 1.890231  | 1.945708  |
| 1  | -4.424617 | 1.998722  | 1.579666  |
| 1  | 0.243207  | 0.730668  | 2.501177  |
| 1  | 0.239459  | -1.403595 | 2.227861  |

**TS1 (H-migration from Int1)**

E<sub>SCF</sub> = -1142.33678722 Hartree

Singlet, neutral

|    |           |           |           |
|----|-----------|-----------|-----------|
| 5  | -0.920908 | -0.025205 | -0.117621 |
| 6  | -0.598829 | 0.970854  | 1.089960  |
| 6  | -1.298814 | 2.148411  | 0.936537  |
| 6  | -1.262011 | 3.358360  | 1.830484  |
| 1  | -0.560358 | 3.223934  | 2.656869  |
| 1  | -0.964731 | 4.259290  | 1.280130  |
| 1  | -2.248428 | 3.558934  | 2.266314  |
| 6  | -2.099318 | 2.116497  | -0.261592 |
| 6  | -2.920672 | 3.296666  | -0.684982 |
| 1  | -3.606304 | 3.587168  | 0.119528  |
| 1  | -2.281067 | 4.166510  | -0.883288 |
| 1  | -3.510833 | 3.091154  | -1.579894 |
| 6  | -1.899907 | 0.938171  | -0.998058 |
| 6  | -2.691801 | 0.525813  | -2.212646 |
| 1  | -3.000171 | 1.366334  | -2.843330 |
| 1  | -2.111149 | -0.166771 | -2.831166 |
| 1  | -3.594694 | -0.015296 | -1.904774 |
| 6  | 0.298702  | 0.632473  | 2.240667  |
| 1  | 1.077028  | -0.075353 | 1.937348  |
| 1  | 0.779704  | 1.498479  | 2.708338  |
| 1  | -0.298649 | 0.122232  | 3.008767  |
| 6  | -1.225987 | -1.566372 | 0.127384  |
| 6  | -0.212195 | -2.533009 | 0.215468  |
| 1  | 0.824638  | -2.230366 | 0.071569  |
| 6  | -0.495215 | -3.872779 | 0.481132  |
| 1  | 0.313946  | -4.596077 | 0.542827  |
| 6  | -1.814475 | -4.284775 | 0.664000  |
| 1  | -2.040174 | -5.328105 | 0.866643  |
| 6  | -2.841704 | -3.345187 | 0.583731  |
| 1  | -3.874070 | -3.654537 | 0.726091  |
| 6  | -2.544946 | -2.008075 | 0.321309  |
| 1  | -3.358795 | -1.285993 | 0.271785  |
| 6  | 2.362112  | 0.306343  | -0.689610 |
| 6  | 2.946223  | 1.200594  | 0.214588  |
| 1  | 2.371245  | 2.053679  | 0.569548  |
| 6  | 4.251780  | 1.003293  | 0.658832  |
| 1  | 4.693425  | 1.701789  | 1.363810  |
| 6  | 4.993374  | -0.080927 | 0.190942  |
| 1  | 6.013343  | -0.231327 | 0.532091  |
| 6  | 4.423511  | -0.968114 | -0.721923 |
| 6  | 3.114379  | -0.777639 | -1.159688 |
| 1  | 2.674023  | -1.477882 | -1.865890 |
| 1  | 4.997741  | -1.812456 | -1.092561 |
| 1  | -0.693972 | 1.570526  | -1.479269 |
| 15 | 0.632410  | 0.572596  | -1.225215 |
| 1  | 0.611438  | -0.152377 | -2.434385 |

## Product 1 (Prod1, ring opened product)

E<sub>SCF</sub> = -1142.38487989 Hartree

Singlet, neutral

|    |           |           |           |
|----|-----------|-----------|-----------|
| 6  | 2.150715  | 1.422692  | 2.770914  |
| 6  | 1.144984  | 1.548719  | 1.667040  |
| 6  | 1.331057  | 2.093736  | 0.451225  |
| 6  | 0.281899  | 1.965360  | -0.591479 |
| 6  | -0.243699 | 0.750416  | -0.869959 |
| 6  | -1.309982 | 0.589442  | -1.939232 |
| 1  | -1.005432 | 1.089499  | -2.866813 |
| 1  | -1.491960 | -0.463661 | -2.175103 |
| 1  | -2.272826 | 1.017109  | -1.629080 |
| 5  | 0.272696  | -0.537304 | -0.149384 |
| 15 | -0.911833 | -1.588436 | 0.966154  |
| 1  | -0.877219 | -2.818233 | 0.266902  |
| 6  | -2.590176 | -1.013704 | 0.506522  |
| 6  | -3.031117 | 0.217327  | 1.010446  |
| 6  | -4.284690 | 0.719799  | 0.668931  |
| 6  | -5.128652 | -0.011877 | -0.166194 |
| 1  | -6.107947 | 0.376345  | -0.430132 |
| 6  | -4.710035 | -1.249746 | -0.652638 |
| 6  | -3.450030 | -1.744953 | -0.320871 |
| 1  | -3.127831 | -2.702699 | -0.722963 |
| 1  | -5.362479 | -1.829513 | -1.299659 |
| 1  | -4.604704 | 1.681206  | 1.060924  |
| 1  | -2.383990 | 0.794934  | 1.667872  |
| 6  | 1.742570  | -1.051376 | -0.320193 |
| 6  | 2.327294  | -1.976089 | 0.564586  |
| 1  | 1.756221  | -2.335445 | 1.419140  |
| 6  | 3.633080  | -2.425726 | 0.388166  |
| 1  | 4.065503  | -3.130190 | 1.093192  |
| 6  | 4.384461  | -1.972574 | -0.696863 |
| 1  | 5.401469  | -2.326872 | -0.840743 |
| 6  | 3.826040  | -1.064380 | -1.595656 |
| 1  | 4.406359  | -0.711402 | -2.443832 |
| 6  | 2.524365  | -0.606673 | -1.401837 |
| 1  | 2.097993  | 0.110349  | -2.100427 |
| 6  | -0.145765 | 3.218146  | -1.324459 |
| 1  | 0.109323  | 4.119743  | -0.759993 |
| 1  | 0.330092  | 3.294557  | -2.311491 |
| 1  | -1.228317 | 3.218670  | -1.488347 |
| 6  | 2.611414  | 2.770527  | 0.024489  |
| 1  | 2.410213  | 3.575751  | -0.689022 |
| 1  | 3.167221  | 3.195629  | 0.863118  |
| 1  | 3.260724  | 2.043652  | -0.482892 |
| 1  | 0.161894  | 1.130816  | 1.884859  |
| 1  | 3.108681  | 1.886522  | 2.526866  |
| 1  | 1.777683  | 1.862003  | 3.702960  |
| 1  | 2.340938  | 0.359907  | 2.971656  |

## Product 2 (Prod2, ring closed product)

E<sub>SCF</sub> = -1142.4027099 Hartree

Singlet, neutral

|    |           |           |           |
|----|-----------|-----------|-----------|
| 6  | -1.322852 | 0.425012  | 0.723792  |
| 6  | -1.664154 | 1.863314  | 0.321486  |
| 6  | -2.970294 | 2.448204  | 0.775400  |
| 1  | -2.991517 | 2.548050  | 1.868237  |
| 1  | -3.159244 | 3.436739  | 0.350404  |
| 1  | -3.803935 | 1.791451  | 0.499005  |
| 6  | -0.695032 | 2.472967  | -0.384361 |
| 6  | -0.698814 | 3.887073  | -0.890483 |
| 1  | 0.007671  | 4.509670  | -0.327618 |
| 1  | -0.381144 | 3.916582  | -1.940296 |
| 1  | -1.682072 | 4.358224  | -0.821005 |
| 6  | 0.534564  | 1.605752  | -0.624992 |
| 1  | 0.762066  | 1.544489  | -1.702662 |
| 6  | 1.790252  | 2.172079  | 0.078365  |
| 1  | 1.641756  | 2.221287  | 1.163901  |
| 1  | 2.672837  | 1.555590  | -0.114993 |
| 1  | 2.005340  | 3.187876  | -0.271748 |
| 5  | 0.062394  | 0.212682  | -0.040141 |
| 6  | 2.636378  | -1.155126 | -0.146962 |
| 6  | 3.400256  | -0.906501 | -1.293210 |
| 6  | 4.750577  | -0.572972 | -1.190389 |
| 1  | 5.326838  | -0.374195 | -2.089538 |
| 6  | 5.360935  | -0.506908 | 0.060560  |
| 6  | 4.614255  | -0.776886 | 1.207824  |
| 6  | 3.261158  | -1.092093 | 1.104967  |
| 1  | 2.682006  | -1.277457 | 2.006712  |
| 1  | 5.084011  | -0.730888 | 2.186340  |
| 1  | 6.413608  | -0.252733 | 0.142158  |
| 1  | 2.934151  | -0.972204 | -2.273786 |
| 6  | -2.348996 | -0.580205 | 0.219285  |
| 6  | -2.785823 | -1.670150 | 0.980353  |
| 1  | -2.431613 | -1.802967 | 1.997923  |
| 6  | -3.683155 | -2.601226 | 0.453570  |
| 1  | -4.007324 | -3.437661 | 1.066641  |
| 6  | -4.163355 | -2.461258 | -0.844907 |
| 1  | -4.861740 | -3.185657 | -1.253356 |
| 6  | -3.739329 | -1.377695 | -1.615322 |
| 1  | -4.106635 | -1.253562 | -2.630246 |
| 6  | -2.844317 | -0.452971 | -1.088417 |
| 1  | -2.522691 | 0.392717  | -1.694008 |
| 6  | -1.092886 | 0.336950  | 2.246716  |
| 1  | -0.403165 | 1.124381  | 2.569156  |
| 1  | -2.033647 | 0.466856  | 2.796507  |
| 1  | -0.661490 | -0.625581 | 2.542871  |
| 15 | 0.840449  | -1.494635 | -0.353984 |
| 1  | 0.561012  | -2.129060 | 0.880217  |

## Intermediate 3 (Ph migration from Int1)

E<sub>SCF</sub> = -1142.3609863 Hartree

Singlet, neutral

|    |           |           |           |
|----|-----------|-----------|-----------|
| 6  | -1.805079 | 0.263162  | 0.791666  |
| 6  | -2.433102 | 1.366557  | -0.059423 |
| 6  | -3.893719 | 1.297994  | -0.383550 |
| 1  | -4.510574 | 1.393403  | 0.521219  |
| 1  | -4.205910 | 2.081756  | -1.078575 |
| 1  | -4.144550 | 0.328053  | -0.834699 |
| 6  | -1.534923 | 2.324571  | -0.401737 |
| 6  | -1.816934 | 3.568548  | -1.199028 |
| 1  | -1.602621 | 4.467585  | -0.607725 |
| 1  | -1.179374 | 3.617691  | -2.090456 |
| 1  | -2.857180 | 3.627048  | -1.527743 |
| 6  | -0.173260 | 2.035776  | 0.105859  |
| 6  | 0.968579  | 2.962107  | -0.202035 |
| 1  | 0.776347  | 3.979287  | 0.166268  |
| 1  | 1.904598  | 2.624249  | 0.255438  |
| 1  | 1.146680  | 3.053311  | -1.283947 |
| 5  | -0.287096 | 0.795828  | 0.844201  |
| 6  | -1.860562 | -1.082206 | 0.084681  |
| 6  | -2.231842 | -2.269171 | 0.724447  |
| 1  | -2.552573 | -2.250723 | 1.761886  |
| 6  | -2.212123 | -3.494658 | 0.047845  |
| 1  | -2.510359 | -4.399136 | 0.571650  |
| 6  | -1.823854 | -3.557094 | -1.284522 |
| 1  | -1.811819 | -4.506708 | -1.811514 |
| 6  | -1.455207 | -2.377899 | -1.941057 |
| 1  | -1.155182 | -2.408928 | -2.985293 |
| 6  | -1.472812 | -1.164777 | -1.265325 |
| 1  | -1.188206 | -0.246504 | -1.776849 |
| 6  | -2.469383 | 0.246038  | 2.179456  |
| 1  | -2.435657 | 1.252540  | 2.609208  |
| 1  | -3.520251 | -0.070008 | 2.126615  |
| 1  | -1.958072 | -0.428593 | 2.876847  |
| 15 | 1.129061  | -0.265137 | 1.497413  |
| 1  | 1.627837  | -0.089901 | 2.805698  |
| 6  | 2.667909  | -0.263104 | 0.525250  |
| 6  | 3.901949  | -0.507064 | 1.135196  |
| 6  | 2.600016  | -0.020724 | -0.849434 |
| 6  | 5.065208  | -0.518302 | 0.369353  |
| 1  | 3.958909  | -0.685536 | 2.206512  |
| 6  | 3.766411  | -0.036720 | -1.611122 |
| 1  | 1.636800  | 0.192763  | -1.307921 |
| 6  | 4.996546  | -0.285214 | -1.003925 |
| 1  | 6.023364  | -0.705003 | 0.844767  |
| 1  | 3.713755  | 0.152134  | -2.678999 |
| 1  | 5.904298  | -0.292220 | -1.600054 |
| 1  | 0.736388  | -1.615557 | 1.579900  |

## Intermediate 2 (H migration from Int1)

E<sub>SCF</sub> = -1142.39255562 Hartree

Singlet, neutral

|    |           |           |           |
|----|-----------|-----------|-----------|
| 5  | -0.914661 | 0.112565  | -0.034088 |
| 1  | 0.319289  | -0.922736 | -1.753752 |
| 6  | -0.279366 | 1.344126  | 0.643581  |
| 6  | 0.879309  | 1.778695  | -0.090445 |
| 6  | 1.798923  | 2.875582  | 0.370458  |
| 1  | 1.295554  | 3.850296  | 0.357602  |
| 1  | 2.138474  | 2.706229  | 1.399106  |
| 1  | 2.688952  | 2.946935  | -0.260250 |
| 6  | 1.034194  | 1.021744  | -1.223636 |
| 6  | 2.200311  | 1.100290  | -2.159091 |
| 1  | 2.432175  | 2.133867  | -2.438684 |
| 1  | 3.096531  | 0.681778  | -1.677808 |
| 1  | 2.013162  | 0.527225  | -3.071472 |
| 6  | -0.089274 | 0.047637  | -1.439354 |
| 6  | -1.000546 | 0.549723  | -2.583593 |
| 1  | -0.449015 | 0.667866  | -3.524471 |
| 1  | -1.817310 | -0.159488 | -2.748344 |
| 1  | -1.447293 | 1.516516  | -2.325359 |
| 6  | -0.752052 | 2.101465  | 1.845365  |
| 1  | 0.056277  | 2.339591  | 2.547672  |
| 1  | -1.164231 | 3.062895  | 1.505362  |
| 1  | -1.546313 | 1.569566  | 2.376412  |
| 6  | -2.467621 | -0.236421 | 0.047878  |
| 6  | -2.944832 | -1.553247 | -0.046844 |
| 1  | -2.229528 | -2.373116 | -0.094416 |
| 6  | -4.308049 | -1.840852 | -0.070956 |
| 1  | -4.644323 | -2.871784 | -0.145432 |
| 6  | -5.241474 | -0.806616 | 0.006253  |
| 1  | -6.305407 | -1.026650 | -0.007777 |
| 6  | -4.797071 | 0.510436  | 0.101883  |
| 1  | -5.514903 | 1.324629  | 0.159927  |
| 6  | -3.428534 | 0.784124  | 0.120238  |
| 1  | -3.100345 | 1.821164  | 0.181390  |
| 15 | 0.121321  | -1.072648 | 1.376520  |
| 6  | 1.858557  | -1.106296 | 0.830398  |
| 6  | 2.852338  | -0.255989 | 1.338699  |
| 6  | 2.221307  | -2.024729 | -0.166761 |
| 6  | 4.160428  | -0.316704 | 0.865590  |
| 1  | 2.594654  | 0.462383  | 2.113752  |
| 6  | 3.527062  | -2.085023 | -0.648967 |
| 1  | 1.470596  | -2.705676 | -0.563184 |
| 6  | 4.500354  | -1.228338 | -0.135753 |
| 1  | 4.914689  | 0.349941  | 1.274705  |
| 1  | 3.785446  | -2.803274 | -1.421824 |
| 1  | 5.519810  | -1.274664 | -0.507806 |
| 1  | 0.302763  | -0.254243 | 2.517620  |

|                                           |           |           |           |          |           |
|-------------------------------------------|-----------|-----------|-----------|----------|-----------|
| Product 3 (Prod3, bisborole)              |           | 6         | -3.191583 | 1.701764 | 0.297990  |
|                                           |           | 1         | -2.480437 | 1.964302 | 1.078032  |
|                                           |           | 6         | -4.352943 | 2.453721 | 0.156619  |
| E <sub>SCF</sub> = -1710.69376701 Hartree |           | 1         | -4.540658 | 3.289238 | 0.824603  |
| Singlet, neutral                          |           | 6         | -5.269816 | 2.141179 | -0.846072 |
| 6                                         | -4.021670 | -0.805726 | 2.867939  |          |           |
| 6                                         | -3.153405 | -1.474188 | 1.847831  |          |           |
| 1                                         | -2.080760 | -1.333714 | 1.975977  |          |           |
| 6                                         | -3.560431 | -2.176268 | 0.778608  |          |           |
| 6                                         | -2.574319 | -2.646286 | -0.224124 |          |           |
| 6                                         | -1.650328 | -1.811772 | -0.761592 |          |           |
| 5                                         | -1.634185 | -0.285713 | -0.407338 |          |           |
| 15                                        | -0.000009 | 0.539601  | 0.000346  |          |           |
| 5                                         | 1.634132  | -0.285802 | 0.407667  |          |           |
| 6                                         | 1.650257  | -1.811913 | 0.761735  |          |           |
| 6                                         | 2.574047  | -2.646456 | 0.223987  |          |           |
| 6                                         | 3.560142  | -2.176431 | -0.778810 |          |           |
| 6                                         | 3.153038  | -1.474282 | -1.847950 |          |           |
| 1                                         | 2.080379  | -1.333683 | -1.975860 |          |           |
| 6                                         | 4.021001  | -0.805868 | -2.868355 |          |           |
| 1                                         | 5.061723  | -1.132749 | -2.819184 |          |           |
| 1                                         | 3.649868  | -0.980015 | -3.883316 |          |           |
| 1                                         | 4.011576  | 0.279718  | -2.699793 |          |           |
| 6                                         | 5.010464  | -2.461016 | -0.470653 |          |           |
| 1                                         | 5.124037  | -3.395607 | 0.086445  |          |           |
| 1                                         | 5.629654  | -2.526936 | -1.367922 |          |           |
| 1                                         | 5.410921  | -1.656659 | 0.160390  |          |           |
| 6                                         | 2.625184  | -4.113818 | 0.597190  |          |           |
| 1                                         | 3.005609  | -4.266165 | 1.615268  |          |           |
| 1                                         | 1.621506  | -4.552576 | 0.564174  |          |           |
| 1                                         | 3.259382  | -4.680644 | -0.088586 |          |           |
| 6                                         | 0.639260  | -2.363960 | 1.749421  |          |           |
| 1                                         | -0.157750 | -2.929439 | 1.246537  |          |           |
| 1                                         | 1.114255  | -3.040607 | 2.468618  |          |           |
| 1                                         | 0.157094  | -1.562599 | 2.315183  |          |           |
| 6                                         | 2.923510  | 0.604216  | 0.538433  |          |           |
| 6                                         | 3.869270  | 0.301426  | 1.531569  |          |           |
| 1                                         | 3.695440  | -0.551655 | 2.183350  |          |           |
| 6                                         | 5.023633  | 1.064233  | 1.694261  |          |           |
| 1                                         | 5.733232  | 0.814513  | 2.477944  |          |           |
| 6                                         | 5.270146  | 2.140554  | 0.846177  |          |           |
| 1                                         | 6.172499  | 2.733275  | 0.964309  |          |           |
| 6                                         | 4.353296  | 2.453161  | -0.156517 |          |           |
| 1                                         | 4.541133  | 3.288586  | -0.824582 |          |           |
| 6                                         | 3.191804  | 1.701391  | -0.297778 |          |           |
| 1                                         | 2.480667  | 1.963986  | -1.077809 |          |           |
| 6                                         | 0.000152  | 2.359479  | 0.000081  |          |           |
| 6                                         | -0.560246 | 3.071455  | -1.067662 |          |           |
| 6                                         | -0.568388 | 4.463009  | -1.062275 |          |           |
| 6                                         | 0.000497  | 5.162142  | -0.000330 |          |           |
| 6                                         | 0.569206  | 4.463180  | 1.061822  |          |           |
| 6                                         | 0.560718  | 3.071630  | 1.067619  |          |           |
| 1                                         | 1.002981  | 2.530212  | 1.899296  |          |           |
| 1                                         | 1.014860  | 5.001432  | 1.892820  |          |           |
| 1                                         | 0.000632  | 6.247902  | -0.000489 |          |           |
| 1                                         | -1.013908 | 5.001127  | -1.893432 |          |           |
| 1                                         | -1.002639 | 2.529903  | -1.899184 |          |           |
| 6                                         | -2.923437 | 0.604477  | -0.538120 |          |           |
